# Supplementary material
Source: PubMed Central journal article supplement (PMC7141400)
Supplement: jciinsight-5-132158-s160.pdf [file jciinsight-5-132158-s160.pdf]

## **SUPPLEMENTARY MATERIAL**

### **Hydroxysteroid 17-beta dehydrogenase 13 variant protects against fibrosis in subjects with non-alcoholic fatty liver disease**

Panu K. Luukkonen, Taru Tukiainen, Anne Juuti, Henna Sammalkorpi, P.A. Nidhina Haridas, Onni Niemelä, Johanna Arola, Marju Orho-Melander, Antti Hakkarainen, Petri T. Kovanen, Om Dwivedi, Leif Groop, Leanne Hodson, Amalia Gastaldelli, Tuulia Hyötyläinen, Matej Orešič, Hannele Yki-Järvinen

## TABLE OF CONTENTS

|                                    |           |
|------------------------------------|-----------|
| <b>Lipidomics analysis.....</b>    | <b>3</b>  |
| <b>Supplementary Table 1.....</b>  | <b>5</b>  |
| <b>Supplementary Table 2.....</b>  | <b>6</b>  |
| <b>Supplementary Table 3.....</b>  | <b>7</b>  |
| <b>Supplementary Table 4.....</b>  | <b>8</b>  |
| <b>Supplementary Table 5.....</b>  | <b>9</b>  |
| <b>Supplementary Table 6.....</b>  | <b>10</b> |
| <b>Supplementary Table 7.....</b>  | <b>14</b> |
| <b>Supplementary Table 8.....</b>  | <b>17</b> |
| <b>Supplementary Table 9.....</b>  | <b>45</b> |
| <b>Supplementary Table 10.....</b> | <b>46</b> |
| <b>Supplementary Figure 1.....</b> | <b>48</b> |
| <b>Supplementary Figure 2.....</b> | <b>49</b> |

## Lipidomics analysis

Lipidomics using UHPLC-MS was performed at VTT Technical Research Centre of Finland (Espoo, Finland). Liver tissue (approximately 5 mg) was first homogenized when still frozen (Covaris, CryoPrep CP02, MA), and weighted. An aliquot (20  $\mu$ L) of an internal standard mixture containing PC(17:0/0:0), PC(17:0/17:0), PE(17:0/17:0), phosphatidylglycerol(17:0/17:0)[rac], Ceramide(d18:1/17:0), PS(17:0/17:0), phosphatidic acid(17:0/17:0) (Avanti Polar Lipids, Alabaster, AL), monoacylglycerol(17:0/0:0/0:0)[rac], DAG(17:0/17:0/0:0)[rac] and TAG(17:0/17:0/17:0) were added. The lipids were extracted using a mixture of HPLC-grade chloroform and methanol (2:1; 400  $\mu$ L). 50  $\mu$ l of 0.9% NaCl was added and the lower phase (200  $\mu$ L) was collected and 20  $\mu$ L of an internal standard mixture containing labeled PC(16:1/0:0-D<sub>3</sub>), PC(16:1/16:1-D<sub>6</sub>) and TAG(16:0/16:0/16:0-<sup>13</sup>C<sub>3</sub>) was added. The extracts were run on a Waters Q-TOF Premier mass spectrometer combined with an Acquity Ultra Performance LC™ as described earlier [1].

The column (at 50 °C) was an Acquity UPLC™ BEH C18 2.1  $\times$  100 mm with 1.7  $\mu$ m particles. The solvent system included A. ultrapure water (1% 1 M NH<sub>4</sub>Ac, 0.1% HCOOH) and B. LC/MS grade acetonitrile/isopropanol (1:1, 1% 1M NH<sub>4</sub>Ac, 0.1% HCOOH). The gradient started from 65% A / 35% B, reached 80% B in 2 min, 100% B in 7 min and remained there for 7 min. The flow rate was 0.400 ml/min and the injected amount was 2.0  $\mu$ l (Acquity Sample Organizer, at 10 °C). Reserpine was used as the lock spray reference compound. The lipid profiling was carried out using electrospray ionization mode and the data were collected at a mass range of m/z 300-1200 with a scan duration of 0.2 sec.

The data processing included alignment of peaks, peak integration, normalization and identification. Lipids were identified using an internal spectral library. The data were normalized using one or more

internal standards representative of each class of lipid present in the samples: the intensity of each identified lipid was normalized by dividing it with the intensity of its corresponding standard and multiplying it by the concentration of the standard. All monoacyl lipids except cholesterol esters, such as monoacylglycerols and monoacylglycerophospholipids, were normalized with PC(17:0/0:0), all diacyl lipids except ethanolamine phospholipids were normalized with PC(17:0/17:0), all ceramides with Cer(d18:1/17:0), all diacyl ethanolamine phospholipids with PE(17:0/17:0), and TAG and cholesterol esters with TAG(17:0/17:0/17:0). Other (unidentified) molecular species were normalized with PC(17:0/0:0) for retention times < 300 s, PC(17:0/17:0) for a retention time between 300 s and 410 s, and TAG(17:0/17:0/17:0) for longer retention times.

Quality control of the method showed that the day-to-day repeatability of control serum samples, and the relative standard deviation (RSD) for identified lipids was on average 14.1% in ESI+ mode and 9.5% in ESI- mode. The internal standards added to all samples in the study had an average RSD of 10.8% in ESI+ mode and 8.0% in ESI- mode.

- [1] Nygren H, Seppänen-Laakso T, Castillo S, Hyötyläinen T, Oresic M. Liquid Chromatography-Mass Spectrometry (LC-MS)-Based Lipidomics for Studies of Body Fluids and Tissues. In: Metz TO, ed. *Metabolic Profiling*. Totowa, NJ: Humana Press; 2010. p. 247–257.

**Supplementary Table 1. Clinical characteristics of the study subjects with liver lipidomics data according to the HSD17B13 genotype at rs72613567.**

|                                               | <b>TT<br/>(n=48)</b> | <b>TTA/TATA<br/>(n=38)</b> |
|-----------------------------------------------|----------------------|----------------------------|
| Age (years)                                   | 44.9 ± 1.2           | 46.7 ± 1.3                 |
| Gender (% women)                              | 72.9                 | 68.4                       |
| BMI (kg/m <sup>2</sup> )                      | 45.8 ± 0.8           | 44.6 ± 1.1                 |
| fP-Glucose (mmol/L)                           | 5.7 (5.0 – 6.0)      | 5.6 (5.0 – 6.0)            |
| fS-Insulin (mU/L)                             | 12.1 (6.9 – 18.8)    | 13.4 (7.3 – 17.8)          |
| fP-Triglycerides (mmol/L)                     | 1.21 (0.91 – 1.53)   | 1.31 (0.98 – 1.71)         |
| fP-HDL cholesterol (mmol/L)                   | 1.12 (0.99 – 1.37)   | 1.06 (0.96 – 1.38)         |
| fP-LDL cholesterol (mmol/L)                   | 2.6 ± 0.1            | 2.7 ± 0.1                  |
| P-AST (IU/L)                                  | 32.9 ± 1.9           | 31.4 ± 1.3                 |
| P-ALT (IU/L)                                  | 38.1 ± 2.4           | 34.6 ± 2.4                 |
| S-Transferrin (g/l)                           | 2.5 ± 0.1            | 2.6 ± 0.1                  |
| S-CDT                                         | 37.5 ± 1.6           | 38.2 ± 1.1                 |
| %CDT                                          | 1.5 ± 0.1            | 1.5 ± 0.1                  |
| GGT-CDT                                       | 3.2 ± 0.1            | 3.4 ± 0.1                  |
| Macrovesicular steatosis (%)                  | 5 (0 – 30)           | 5 (0 – 26)                 |
| Steatosis score (%; 0/1/2/3)                  | 33/47/9/11           | 32/61/8/0                  |
| Activity grade (%; 0/1/2/3/4)                 | 86/9/5/0/0           | 82/11/8/0/0                |
| Ballooning (%; 0/1/2)                         | 95/5/0               | 89/11/0                    |
| Inflammation (%; 0/1/2)                       | 86/14/0              | 84/16/0                    |
| Fibrosis stage (%; 0/1/2/3/4)                 | 69/27/4/0/0          | 61/39/0/0/0                |
| Subjects with significant fibrosis (F ≥ 2, %) | 4.2                  | 0.0                        |
| HSD17B13 genotype (%; TT/TTA/TATA)            | 100/0/0              | 0/95/5 *                   |
| PNPLA3 genotype (%; CC/CG/GG)                 | 56/38/6              | 45/50/5                    |
| TM6SF2 genotype (%; CC/CT/TT)                 | 81/17/2              | 97/3/0                     |
| MBOAT7 genotype (%; CC/CT/TT)                 | 38/54/8              | 33/42/25                   |

Data are in %, means ± SEM or median (25th-75th percentile), as appropriate. \* P ≤ 0.05.

**Supplementary Table 2. Clinical characteristics of the study subjects in hepatic gene expression analysis according to the HSD17B13 genotype at rs72613567.**

|                                               | <b>TT<br/>(n=50)</b> | <b>TTA/TATA<br/>(n=36)</b> |
|-----------------------------------------------|----------------------|----------------------------|
| Age (years)                                   | 45.6 ± 1.2           | 48.7 ± 1.5                 |
| Gender (% women)                              | 74.5                 | 67.6                       |
| BMI (kg/m <sup>2</sup> )                      | 45.8 ± 0.8           | 45.1 ± 1.2                 |
| fP-Glucose (mmol/L)                           | 5.8 (5.1 – 6.5)      | 5.7 (5.0 – 6.1)            |
| fS-Insulin (mU/L)                             | 14.5 (8.3 – 19.7)    | 12.4 (6.4 – 15.8)          |
| fP-Triglycerides (mmol/L)                     | 1.16 (0.91 – 1.45)   | 1.31 (0.98 – 1.74)         |
| fP-HDL cholesterol (mmol/L)                   | 1.08 (0.92 – 1.33)   | 1.07 (0.96 – 1.47)         |
| fP-LDL cholesterol (mmol/L)                   | 2.4 ± 0.1            | 2.7 ± 0.1                  |
| P-AST (IU/L)                                  | 34 ± 2               | 32 ± 1                     |
| P-ALT (IU/L)                                  | 39 ± 3               | 37 ± 3                     |
| Macrovesicular steatosis (%)                  | 10 (0 – 34)          | 5 (0 – 25)                 |
| Steatosis score (%; 0/1/2/3)                  | 27/48/15/10          | 35/59/3/3                  |
| Activity grade (%; 0/1/2/3/4)                 | 83/11/4/2            | 85/6/9/0                   |
| Ballooning (%; 0/1/2)                         | 94/6/0               | 88/12/0                    |
| Inflammation (%; 0/1/2)                       | 83/15/2              | 88/12/0                    |
| Fibrosis stage (%; 0/1/2/3/4)                 | 58/33/6/2/0          | 59/41/0/0/0                |
| Subjects with significant fibrosis (F ≥ 2, %) | 8.3                  | 0.0                        |
| HSD17B13 genotype (%; TT/TTA/TATA)            | 100/0/0              | 0/97/3 *                   |
| PNPLA3 genotype (%; CC/CG/GG)                 | 53/41/6              | 41/53/6                    |
| TM6SF2 genotype (%; CC/CT/TT)                 | 80/18/2              | 97/3/0                     |
| MBOAT7 genotype (%; CC/CT/TT)                 | 34/56/10             | 35/45/19                   |

Data are in %, means ± SEM or median (25th-75th percentile), as appropriate. \* P ≤ 0.05.

**Supplementary Table 3. Clinical characteristics of the study subjects analysed with respect to hepatic *de novo* lipogenesis according to the HSD17B13 genotype at rs72613567.**

|                                            | <b>TT<br/>(n=67)</b> | <b>TTA/TATA<br/>(n=59)</b> |
|--------------------------------------------|----------------------|----------------------------|
| Age (years)                                | 45.8 ± 0.8           | 46.7 ± 0.9                 |
| Gender (% women)                           | 58.2                 | 54.2                       |
| BMI (kg/m <sup>2</sup> )                   | 27.8 ± 0.5           | 27.6 ± 0.5                 |
| <i>De novo</i> lipogenesis (%)             | 7.7 ± 0.8            | 7.5 ± 0.8                  |
| fP-Glucose (mmol/L)                        | 5.3 ± 0.1            | 5.3 ± 0.1                  |
| fP-Insulin (mU/L)                          | 14.0 ± 1.0           | 12.8 ± 0.9                 |
| fP-Triglycerides (mmol/L)                  | 1.3 ± 0.1            | 1.3 ± 0.1                  |
| fP-HDL cholesterol (mmol/L)                | 1.32 ± 0.05          | 1.35 ± 0.05                |
| fP-non-HDL cholesterol (mmol/L)            | 3.8 ± 0.1            | 3.7 ± 0.1                  |
| IHTG (% <sup>1</sup> , <sup>1</sup> H-MRS) | 5.3 ± 0.9            | 5.1 ± 0.8                  |
| HSD17B13 genotype (%TT/TTA/TATA)           | 100/0/0              | 0/80/20 *                  |

Data are in %, means ± SEM or median (25th-75th percentile), as appropriate. \* P ≤ 0.05.

**Supplementary Table 4. Clinical characteristics of the study subjects analyzed with respect to adipose tissue lipolysis according to the HSD17B13 genotype at rs72613567.**

|                                  | <b>TT<br/>(n=40)</b> | <b>TTA/TATA<br/>(n=12)</b> |
|----------------------------------|----------------------|----------------------------|
| Age (years)                      | 46 (40 – 59)         | 47 (42 – 59)               |
| Gender (% women)                 | 61                   | 50                         |
| BMI (kg/m <sup>2</sup> )         | 30.1 ± 0.9           | 32.3 ± 2.1                 |
| fP-Glucose (mmol/L)              | 5.5 (5.1 – 6.0)      | 6.0 (5.4 – 6.3)            |
| fS-Insulin (mU/L)                | 8.1 (5.7 – 13.9)     | 9.4 (6.4 – 14.3)           |
| fP-Triglycerides (mmol/L)        | 1.02 (0.74 – 1.41)   | 1.53 (1.09 – 2.60)         |
| fP-HDL cholesterol (mmol/L)      | 1.49 (1.25 – 1.87)   | 1.26 (1.10 – 1.46)         |
| fP-LDL cholesterol (mmol/L)      | 3.2 (2.4 – 3.7)      | 3.8 (2.9 – 4.4)            |
| P-AST (IU/L)                     | 29 (24 – 33)         | 28 (20 – 38)               |
| P-ALT (IU/L)                     | 31 (21 – 44)         | 25 (14 – 52)               |
| IHTG (% <sup>1</sup> H-MRS)      | 4.9 (0.8 – 12.7)     | 4.7 (3.5 – 12.3)           |
| HSD17B13 genotype (%TT/TTA/TATA) | 100/0/0              | 0/100/0 *                  |
| PNPLA3 genotype (%CC/CG/GG)      | 53/28/20             | 67/17/17                   |
| TM6SF2 genotype (%CC/CT/TT)      | 87/13/0              | 92/8/0                     |
| MBOAT7 genotype (%CC/CT/TT)      | 58/25/18             | 33/50/17                   |

Data are in %, means ± SEM or median (25th-75th percentile), as appropriate. \* P ≤ 0.05.



**Supplementary Table 5. Clinical characteristics of the study subjects analysed with respect to hepatic glucose production and insulin sensitivity according to the HSD17B13 genotype at rs72613567.**

|                                     | <b>TT<br/>(n=62)</b> | <b>TTA/TATA<br/>(n=43)</b> |
|-------------------------------------|----------------------|----------------------------|
| Age (years)                         | 47.2 ± 1.3           | 47.9 ± 1.4                 |
| Gender (% women)                    | 30.6                 | 34.9                       |
| BMI (kg/m <sup>2</sup> )            | 28.6 ± 0.7           | 28.9 ± 0.8                 |
| fP-Glucose (mmol/L)                 | 6.1 (5.5 – 8.4)      | 6.1 (5.6 – 8.9)            |
| fS-Insulin (mU/L)                   | 7.7 (5.0 – 14.3)     | 8.0 (5.0 – 12.5)           |
| fP-Triglycerides (mmol/L)           | 1.46 (0.99 – 2.12)   | 1.38 (0.98 – 1.96)         |
| fP-HDL cholesterol (mmol/L)         | 1.16 (1.04 – 1.45)   | 1.25 (1.04 – 1.53)         |
| fP-LDL cholesterol (mmol/L)         | 2.9 ± 0.1            | 2.9 ± 0.1                  |
| P-AST (IU/L)                        | 29 (24 – 37)         | 30 (25 – 46)               |
| P-ALT (IU/L)                        | 34 (21 – 49)         | 30 (23 – 49)               |
| IHTG (% , <sup>1</sup> H-MRS)       | 7.8 (2.0 – 15.0)     | 7.0 (2.0 – 20.0)           |
| HSD17B13 genotype (% , TT/TTA/TATA) | 100/0/0              | 0/98/2 *                   |
| PNPLA3 genotype (% , CC/CG/GG)      | 61/32/6              | 53/42/5                    |
| TM6SF2 genotype (% , CC/CT/TT)      | 85/13/2              | 81/19/0                    |
| MBOAT7 genotype (% , CC/CT/TT)      | 37/44/19             | 40/47/14                   |

Data are in %, means ± SEM or median (25th-75th percentile), as appropriate. \* P ≤ 0.05.

**Supplementary Table 6. Differentially expressed downregulated genes in carriers as compared to non-carriers of the HSD17B13 variant.**

| Ensembl code    | Gene name  | logFC              | qvalue              |
|-----------------|------------|--------------------|---------------------|
| ENSG00000010818 | HIVEP2     | -0.255550480439627 | 0.00152657039895355 |
| ENSG00000163565 | IFI16      | -0.376947817480197 | 0.00443228976469933 |
| ENSG00000040199 | PHLPP2     | -0.305141389215604 | 0.0102064746368355  |
| ENSG00000079387 | SENP1      | -0.203802034434882 | 0.0102064746368355  |
| ENSG00000171467 | ZNF318     | -0.134392784158793 | 0.0131092727491285  |
| ENSG00000153071 | DAB2       | -0.246470156981414 | 0.0131092727491285  |
| ENSG00000136531 | SCN2A      | -0.790606241183511 | 0.0139838258805939  |
| ENSG00000134954 | ETS1       | -0.235216957417972 | 0.014223234786406   |
| ENSG00000178996 | SNX18      | -0.204356302552036 | 0.0145819625963922  |
| ENSG00000038427 | VCAN       | -0.61554828791713  | 0.014758199178601   |
| ENSG00000110395 | CBL        | -0.245627828137411 | 0.014758199178601   |
| ENSG00000111716 | LDHB       | -0.214617520697295 | 0.014758199178601   |
| ENSG00000070961 | ATP2B1     | -0.175472838207055 | 0.0176340337081435  |
| ENSG00000106723 | SPIN1      | -0.12042925905762  | 0.0189143519731582  |
| ENSG00000156675 | RAB11FIP1  | -0.221591760520282 | 0.0189143519731582  |
| ENSG00000254087 | LYN        | -0.213254285012606 | 0.0189143519731582  |
| ENSG00000091527 | CDV3       | -0.157587153199036 | 0.0189143519731582  |
| ENSG00000100644 | HIF1A      | -0.166029060108027 | 0.0189143519731582  |
| ENSG00000184384 | MAML2      | -0.273044575447134 | 0.0189143519731582  |
| ENSG00000168615 | ADAM9      | -0.278675432236274 | 0.0189143519731582  |
| ENSG00000148358 | GPR107     | -0.108238603404056 | 0.0189143519731582  |
| ENSG00000269982 | AC018809.2 | -0.287894559941275 | 0.0189143519731582  |
| ENSG00000008086 | CDKL5      | -0.225905330215992 | 0.0189143519731582  |
| ENSG00000185753 | CXorf38    | -0.132922669398628 | 0.0189143519731582  |
| ENSG00000143322 | ABL2       | -0.170189562258144 | 0.0189143519731582  |
| ENSG00000012779 | ALOX5      | -0.407014430138333 | 0.0189143519731582  |
| ENSG00000179051 | RCC2       | -0.223208046591564 | 0.0189143519731582  |
| ENSG00000064651 | SLC12A2    | -0.299243544583792 | 0.0189143519731582  |
| ENSG00000148158 | SNX30      | -0.166327572905649 | 0.0190669599352241  |
| ENSG00000167703 | SLC43A2    | -0.368872262390875 | 0.0212087074410607  |
| ENSG00000010671 | BTK        | -0.331119469205026 | 0.0214252855477724  |
| ENSG00000104067 | TJP1       | -0.205497441748077 | 0.0214448525685946  |
| ENSG00000187474 | FPR3       | -0.373738153428052 | 0.0271844227602903  |
| ENSG00000095015 | MAP3K1     | -0.152993525859782 | 0.0278161001862596  |
| ENSG00000140575 | IQGAP1     | -0.223777007538627 | 0.0278161001862596  |
| ENSG00000171608 | PIK3CD     | -0.319975128367266 | 0.0278161001862596  |
| ENSG00000064989 | CALCRL     | -0.244038740948373 | 0.0278161001862596  |
| ENSG00000081237 | PTPRC      | -0.371832588085112 | 0.0294025343262216  |
| ENSG00000169860 | P2RY1      | -0.253143556165753 | 0.0294025343262216  |
| ENSG00000133059 | DSTYK      | -0.168387601193684 | 0.0312774488085245  |
| ENSG00000109320 | NFKB1      | -0.104893316380332 | 0.0312974819916256  |

|                 |            |                     |                    |
|-----------------|------------|---------------------|--------------------|
| ENSG00000175356 | SCUBE2     | -0.60869302245801   | 0.0315524098170711 |
| ENSG00000164576 | SAP30L     | -0.155936156599938  | 0.0327120380954181 |
| ENSG00000090339 | ICAM1      | -0.323509125014729  | 0.0327120380954181 |
| ENSG00000176390 | CRLF3      | -0.158860267007592  | 0.0330635845650014 |
| ENSG00000083720 | OXCT1      | -0.333477781101549  | 0.0350537411657173 |
| ENSG00000117528 | ABCD3      | -0.196406732199355  | 0.0350537411657173 |
| ENSG00000136167 | LCP1       | -0.264752043349293  | 0.0350537411657173 |
| ENSG00000099250 | NRP1       | -0.19594884187057   | 0.0350537411657173 |
| ENSG00000065613 | SLK        | -0.125630402667988  | 0.0350537411657173 |
| ENSG00000255197 | AC090559.1 | -0.411833997271112  | 0.0350537411657173 |
| ENSG00000131323 | TRAF3      | -0.164757558048427  | 0.0350537411657173 |
| ENSG00000110851 | PRDM4      | -0.121202414865969  | 0.0350537411657173 |
| ENSG00000088367 | EPB41L1    | -0.701688782462438  | 0.0350537411657173 |
| ENSG00000186517 | ARHGAP30   | -0.28560613965291   | 0.0350537411657173 |
| ENSG00000172936 | MYD88      | -0.147555109576653  | 0.0350537411657173 |
| ENSG00000170832 | USP32      | -0.152812245700867  | 0.0350537411657173 |
| ENSG00000241839 | PLEKHO2    | -0.256934385900962  | 0.0350537411657173 |
| ENSG00000147394 | ZNF185     | -0.336497922410945  | 0.0350537411657173 |
| ENSG00000139946 | PELI2      | -0.263311276509494  | 0.0350537411657173 |
| ENSG00000231205 | ZNF826P    | -0.418321072267426  | 0.0350537411657173 |
| ENSG00000123338 | NCKAP1L    | -0.293707268316214  | 0.0350537411657173 |
| ENSG00000149781 | FERMT3     | -0.224636376511501  | 0.0350537411657173 |
| ENSG00000104856 | RELB       | -0.327379725822036  | 0.0350537411657173 |
| ENSG00000143157 | POGK       | -0.125120000013575  | 0.0350537411657173 |
| ENSG00000169118 | CSNK1G1    | -0.156957562928147  | 0.0350537411657173 |
| ENSG00000164151 | ICE1       | -0.102622909539915  | 0.0351700622313922 |
| ENSG00000143970 | ASXL2      | -0.182605503519094  | 0.0351700622313922 |
| ENSG00000023445 | BIRC3      | -0.333903647301945  | 0.0351700622313922 |
| ENSG00000128052 | KDR        | -0.328005671685864  | 0.0351700622313922 |
| ENSG00000070018 | LRP6       | -0.282845941807     | 0.0351700622313922 |
| ENSG00000164741 | DLC1       | -0.19918824378897   | 0.0351700622313922 |
| ENSG00000163131 | CTSS       | -0.271339328968853  | 0.0351700622313922 |
| ENSG00000120733 | KDM3B      | -0.0868785879794268 | 0.0351700622313922 |
| ENSG00000097033 | SH3GLB1    | -0.106047938903209  | 0.0351700622313922 |
| ENSG00000110925 | CSRNP2     | -0.154774146665981  | 0.0351700622313922 |
| ENSG00000163947 | ARHGEF3    | -0.254119914692815  | 0.0351700622313922 |
| ENSG00000115935 | WIPF1      | -0.244979675332425  | 0.0351700622313922 |
| ENSG00000148498 | PARD3      | -0.092550771581415  | 0.0351700622313922 |
| ENSG00000171475 | WIPF2      | -0.111833391310852  | 0.0351700622313922 |
| ENSG00000123836 | PFKFB2     | -0.165194825870349  | 0.0361534250258057 |
| ENSG00000130559 | CAMSAP1    | -0.161342936226375  | 0.0362198275167072 |
| ENSG00000198589 | LRBA       | -0.131161180524386  | 0.0362198275167072 |
| ENSG00000204592 | HLA-E      | -0.216691804631671  | 0.0362198275167072 |
| ENSG00000135363 | LMO2       | -0.222546222353332  | 0.0362198275167072 |
| ENSG00000155465 | SLC7A7     | -0.287422462937868  | 0.0362198275167072 |

|                 |          |                     |                    |
|-----------------|----------|---------------------|--------------------|
| ENSG00000132640 | BTBD3    | -0.150287728579633  | 0.0362198275167072 |
| ENSG00000103994 | ZNF106   | -0.137417567976229  | 0.0362198275167072 |
| ENSG00000164830 | OXR1     | -0.166996593462062  | 0.0362198275167072 |
| ENSG00000197548 | ATG7     | -0.103718971312444  | 0.0362198275167072 |
| ENSG00000110002 | VWA5A    | -0.222363309456902  | 0.0366528463261233 |
| ENSG00000169641 | LUZP1    | -0.160454444612298  | 0.0366528463261233 |
| ENSG00000026508 | CD44     | -0.296257876920367  | 0.0366528463261233 |
| ENSG00000151491 | EPS8     | -0.107330749844554  | 0.0366528463261233 |
| ENSG00000119314 | PTBP3    | -0.139711200248953  | 0.0366528463261233 |
| ENSG00000113532 | ST8SIA4  | -0.38314182802853   | 0.0369966425563031 |
| ENSG00000119772 | DNMT3A   | -0.156410736129803  | 0.0371883854080159 |
| ENSG00000163823 | CCR1     | -0.427349380148316  | 0.0377030608608754 |
| ENSG00000168214 | RBPJ     | -0.0774058611595499 | 0.0377030608608754 |
| ENSG00000100368 | CSF2RB   | -0.416415972073712  | 0.0378522581170552 |
| ENSG00000136193 | SCRN1    | -0.174990003912419  | 0.0378522581170552 |
| ENSG00000106078 | COBL     | -0.133985018378513  | 0.0378522581170552 |
| ENSG00000159216 | RUNX1    | -0.274158751581859  | 0.0378522581170552 |
| ENSG00000135905 | DOCK10   | -0.252841818600033  | 0.0378522581170552 |
| ENSG00000070190 | DAPP1    | -0.382570400098862  | 0.0383663648909273 |
| ENSG00000110514 | MADD     | -0.119089128891589  | 0.0383663648909273 |
| ENSG00000108960 | MMD      | -0.252160028386511  | 0.0383663648909273 |
| ENSG00000101052 | IFT52    | -0.163569631827382  | 0.0383663648909273 |
| ENSG00000065615 | CYB5R4   | -0.148063739927631  | 0.0384726399577028 |
| ENSG00000145779 | TNFAIP8  | -0.247094373955632  | 0.0384726399577028 |
| ENSG00000166068 | SPRED1   | -0.169300433102229  | 0.0384726399577028 |
| ENSG00000159267 | HLCS     | -0.126193566621713  | 0.0385838704991444 |
| ENSG00000163848 | ZNF148   | -0.118232014958586  | 0.03929344189352   |
| ENSG00000092969 | TGFB2    | -0.430592304621376  | 0.03929344189352   |
| ENSG00000171791 | BCL2     | -0.203694616002049  | 0.0400720894326787 |
| ENSG00000101350 | KIF3B    | -0.115456211150512  | 0.0400720894326787 |
| ENSG00000158985 | CDC42SE2 | -0.105482289087639  | 0.0400720894326787 |
| ENSG00000182240 | BACE2    | -0.2528790925463    | 0.0400720894326787 |
| ENSG00000116641 | DOCK7    | -0.150235035920572  | 0.0419854573635515 |
| ENSG00000160255 | ITGB2    | -0.261852117283093  | 0.0419854573635515 |
| ENSG00000164125 | FAM198B  | -0.301251651122039  | 0.0428083592647208 |
| ENSG00000141968 | VAV1     | -0.302740693322703  | 0.0428083592647208 |
| ENSG00000162511 | LAPTM5   | -0.253764645028454  | 0.0428083592647208 |
| ENSG00000110422 | HIPK3    | -0.14029553604633   | 0.0428083592647208 |
| ENSG00000228223 | HCG11    | -0.274338270884442  | 0.0428132884513263 |
| ENSG00000165025 | SYK      | -0.27499994618794   | 0.0428903554415591 |
| ENSG00000115159 | GPD2     | -0.151638959494685  | 0.0432882526689161 |
| ENSG00000100596 | SPTLC2   | -0.135381971028265  | 0.0434344810265111 |
| ENSG00000168394 | TAP1     | -0.205461400585199  | 0.0434344810265111 |
| ENSG00000163513 | TGFBR2   | -0.158479842130195  | 0.0434344810265111 |
| ENSG00000163219 | ARHGAP25 | -0.239873590034995  | 0.0434344810265111 |

|                 |           |                     |                    |
|-----------------|-----------|---------------------|--------------------|
| ENSG00000143119 | CD53      | -0.259035330790863  | 0.0434344810265111 |
| ENSG00000137845 | ADAM10    | -0.110390536039693  | 0.0435234818157893 |
| ENSG00000168743 | NPNT      | -0.418560695299943  | 0.0435234818157893 |
| ENSG00000038945 | MSR1      | -0.35425233029151   | 0.0437324308775064 |
| ENSG00000113300 | CNOT6     | -0.120030746249939  | 0.0438558835507789 |
| ENSG00000123739 | PLA2G12A  | -0.117196942896365  | 0.0440994687682717 |
| ENSG00000116701 | NCF2      | -0.414596028759862  | 0.0441164462449184 |
| ENSG00000085265 | FCN1      | -0.578619336336452  | 0.0446630895049579 |
| ENSG00000144369 | FAM171B   | -0.358975220374996  | 0.0446630895049579 |
| ENSG00000188419 | CHM       | -0.141941200338088  | 0.0454052725392483 |
| ENSG00000184922 | FMNL1     | -0.281207688506106  | 0.0454826850442338 |
| ENSG00000151702 | FLI1      | -0.175359449046143  | 0.0454826850442338 |
| ENSG00000100731 | PCNX1     | -0.127800207402709  | 0.0454826850442338 |
| ENSG00000151414 | NEK7      | -0.10805436850761   | 0.0454826850442338 |
| ENSG00000145626 | UGT3A1    | -0.307668024015328  | 0.0454826850442338 |
| ENSG00000143079 | CTTNBP2NL | -0.171049435472015  | 0.0454826850442338 |
| ENSG00000178695 | KCTD12    | -0.21694016565592   | 0.0454826850442338 |
| ENSG00000146112 | PPP1R18   | -0.251145381301286  | 0.0454826850442338 |
| ENSG00000175414 | ARL10     | -0.197608094683164  | 0.0454826850442338 |
| ENSG00000009954 | BAZ1B     | -0.113492539944126  | 0.0454826850442338 |
| ENSG00000135220 | UGT2A3    | -0.300895481042515  | 0.0454826850442338 |
| ENSG00000154945 | ANKRD40   | -0.0966280983566202 | 0.0454826850442338 |
| ENSG00000177485 | ZBTB33    | -0.175765424784998  | 0.0454826850442338 |
| ENSG00000043143 | JADE2     | -0.167598586054375  | 0.0454826850442338 |
| ENSG00000091972 | CD200     | -0.412489804065753  | 0.0455212645031174 |
| ENSG00000170456 | DENND5B   | -0.143308781036254  | 0.0460078342800034 |
| ENSG00000198663 | C6orf89   | -0.0870627585715997 | 0.0460078342800034 |
| ENSG00000072736 | NFATC3    | -0.183175070175093  | 0.0463248491133958 |
| ENSG00000102007 | PLP2      | -0.26248150884876   | 0.0467793841524275 |
| ENSG00000185924 | RTN4RL1   | -0.393346612999671  | 0.0470031931979687 |
| ENSG00000186174 | BCL9L     | -0.202718482402855  | 0.0475719846201044 |
| ENSG00000092847 | AGO1      | -0.101932441229664  | 0.0484071853853374 |
| ENSG00000066777 | ARFGEF1   | -0.100282656284485  | 0.0486349977256501 |
| ENSG00000140749 | IGSF6     | -0.318612729986044  | 0.0496363508635229 |
| ENSG00000188641 | DPYD      | -0.161128452813073  | 0.0496661016770657 |

**Supplementary Table 7. Differentially expressed upregulated genes in carriers as compared to non-carriers of the HSD17B13 variant.**

| Ensembl code    | Gene name  | logFC              | qvalue               |
|-----------------|------------|--------------------|----------------------|
| ENSG00000140474 | ULK3       | 0.252562706980281  | 0.000253437091504798 |
| ENSG00000114735 | HEMK1      | 0.203382625328999  | 0.00789603390908803  |
| ENSG00000156463 | SH3RF2     | 0.331416743848355  | 0.0114655045628418   |
| ENSG00000077312 | SNRPA      | 0.19879719686848   | 0.0114655045628418   |
| ENSG00000132793 | LPIN3      | 0.286309861310801  | 0.0139838258805939   |
| ENSG00000117640 | MTFR1L     | 0.0974928947129594 | 0.0139838258805939   |
| ENSG00000130202 | NECTIN2    | 0.254452140861227  | 0.0139838258805939   |
| ENSG00000169696 | ASPSCR1    | 0.217774554618623  | 0.0139838258805939   |
| ENSG00000250328 | MGC32805   | 0.324932230670449  | 0.0170567404398434   |
| ENSG00000010318 | PHF7       | 0.195413181567635  | 0.0189143519731582   |
| ENSG00000213533 | STIMATE    | 0.197299502533252  | 0.0189143519731582   |
| ENSG00000164896 | FASTK      | 0.149087510942694  | 0.0189143519731582   |
| ENSG00000106400 | ZNHIT1     | 0.144627410887437  | 0.0189143519731582   |
| ENSG00000009950 | MLXIPL     | 0.171843430639575  | 0.0189143519731582   |
| ENSG00000117360 | PRPF3      | 0.155520794570807  | 0.0189143519731582   |
| ENSG00000122912 | SLC25A16   | 0.128169577329682  | 0.0189143519731582   |
| ENSG00000111077 | TNS2       | 0.19000184084079   | 0.0189143519731582   |
| ENSG00000277972 | CISD3      | 0.13249007745208   | 0.0303057484535379   |
| ENSG00000270605 | AL353622.1 | 0.356951355154053  | 0.0323058188989331   |
| ENSG00000183401 | CCDC159    | 0.177107986621613  | 0.0324516634107035   |
| ENSG00000108591 | DRG2       | 0.192430668401204  | 0.0327120380954181   |
| ENSG00000232445 | AC006329.1 | 0.57225672845516   | 0.0350537411657173   |
| ENSG00000021461 | CYP3A43    | 0.452931131252008  | 0.0350537411657173   |
| ENSG00000128654 | MTX2       | 0.122285529233212  | 0.0350537411657173   |
| ENSG00000146063 | TRIM41     | 0.0977659253994785 | 0.0350537411657173   |
| ENSG00000127527 | EPS15L1    | 0.115520019484952  | 0.0350537411657173   |
| ENSG00000131051 | RBM39      | 0.109876377216928  | 0.0350537411657173   |
| ENSG00000159377 | PSMB4      | 0.12541657661305   | 0.0350537411657173   |
| ENSG00000182796 | TMEM198B   | 0.153908104993998  | 0.0350537411657173   |
| ENSG00000101194 | SLC17A9    | 0.217843556247413  | 0.0350537411657173   |
| ENSG00000131778 | CHD1L      | 0.222606667684858  | 0.0350537411657173   |
| ENSG00000171163 | ZNF692     | 0.148180290357041  | 0.0350537411657173   |
| ENSG00000189007 | ADAT2      | 0.179893751785141  | 0.0351700622313922   |
| ENSG00000100399 | CHADL      | 0.275943491559015  | 0.0351700622313922   |
| ENSG00000010244 | ZNF207     | 0.082836926825284  | 0.0351700622313922   |
| ENSG00000184925 | LCN12      | 0.23513604947043   | 0.0351700622313922   |
| ENSG00000281344 | HELLPAR    | 0.469805872149946  | 0.0351700622313922   |
| ENSG00000115942 | ORC2       | 0.211004499108229  | 0.0351700622313922   |
| ENSG00000261061 | AC092718.4 | 0.298773442260907  | 0.0351700622313922   |
| ENSG00000186815 | TPCN1      | 0.127181889816476  | 0.0351700622313922   |
| ENSG00000169045 | HNRNPH1    | 0.128499599265436  | 0.0351700622313922   |

|                 |            |                    |                    |
|-----------------|------------|--------------------|--------------------|
| ENSG00000266850 | AC090912.2 | 0.273784314994292  | 0.0351700622313922 |
| ENSG00000165995 | CACNB2     | 0.277158731945274  | 0.0351700622313922 |
| ENSG00000169903 | TM4SF4     | 0.202826976796006  | 0.0352934601842154 |
| ENSG00000025772 | TOMM34     | 0.133333747972885  | 0.0362198275167072 |
| ENSG00000041880 | PARP3      | 0.112874213936489  | 0.0362198275167072 |
| ENSG00000158473 | CD1D       | 0.204462272875883  | 0.0362198275167072 |
| ENSG00000259877 | AC009113.1 | 0.171219248553653  | 0.0366528463261233 |
| ENSG00000124839 | RAB17      | 0.146283788011743  | 0.0366528463261233 |
| ENSG00000153823 | PID1       | 0.26736561333562   | 0.0366528463261233 |
| ENSG00000268218 | AC137932.3 | 0.327482000838927  | 0.0384726399577028 |
| ENSG00000123374 | CDK2       | 0.144954900393777  | 0.0384726399577028 |
| ENSG00000234072 | AC074117.1 | 0.156090943008878  | 0.0384726399577028 |
| ENSG00000140398 | NEIL1      | 0.134143065873963  | 0.0384726399577028 |
| ENSG00000175866 | BAIAP2     | 0.165320973226793  | 0.0384726399577028 |
| ENSG00000106367 | AP1S1      | 0.141003757149189  | 0.0384726399577028 |
| ENSG00000163795 | ZNF513     | 0.170813390763859  | 0.03929344189352   |
| ENSG00000279716 | AC006128.1 | 0.219836862017956  | 0.03929344189352   |
| ENSG00000204149 | AGAP6      | 0.221315292270943  | 0.03929344189352   |
| ENSG00000205981 | DNAJC19    | 0.107629620528967  | 0.03929344189352   |
| ENSG00000163170 | BOLA3      | 0.201464631503846  | 0.039877758307109  |
| ENSG00000159199 | ATP5MC1    | 0.144934349181368  | 0.0400720894326787 |
| ENSG00000169223 | LMAN2      | 0.132655494761782  | 0.0400720894326787 |
| ENSG00000115718 | PROC       | 0.112871998045887  | 0.0400720894326787 |
| ENSG00000231609 | AC007098.1 | 0.342103799979881  | 0.0400720894326787 |
| ENSG00000132329 | RAMP1      | 0.406111594229444  | 0.0420210522137169 |
| ENSG00000273901 | AC012313.9 | 0.248031199716779  | 0.0420210522137169 |
| ENSG00000177542 | SLC25A22   | 0.204301692154657  | 0.0425273546596481 |
| ENSG00000100445 | SDR39U1    | 0.169013845017425  | 0.0425273546596481 |
| ENSG00000130254 | SAFB2      | 0.101543350129275  | 0.0428083592647208 |
| ENSG00000132275 | RRP8       | 0.11887086265706   | 0.0428132884513263 |
| ENSG00000104872 | PIH1D1     | 0.106294678245532  | 0.0433397239933552 |
| ENSG00000158882 | TOMM40L    | 0.149738489623893  | 0.0433594741415914 |
| ENSG00000123353 | ORMDL2     | 0.165318838076669  | 0.0433594741415914 |
| ENSG00000198171 | DDRGK1     | 0.11179338641767   | 0.0434344810265111 |
| ENSG00000088386 | SLC15A1    | 0.218141121530868  | 0.0434344810265111 |
| ENSG00000204576 | PRR3       | 0.22501556452472   | 0.0437324308775064 |
| ENSG00000177595 | PIDD1      | 0.157695339960051  | 0.0440412424603926 |
| ENSG00000203993 | ARRDC1-AS1 | 0.16265163469406   | 0.0446630895049579 |
| ENSG00000165471 | MBL2       | 0.618953177032195  | 0.0446939540893016 |
| ENSG00000132522 | GPS2       | 0.19362601124249   | 0.0446939540893016 |
| ENSG00000134809 | TIMM10     | 0.218904765472307  | 0.0454826850442338 |
| ENSG00000003756 | RBM5       | 0.0917304580823693 | 0.0454826850442338 |
| ENSG00000104852 | SNRNP70    | 0.122259445860635  | 0.0454826850442338 |
| ENSG00000110200 | ANAPC15    | 0.169327451240927  | 0.0454826850442338 |
| ENSG00000237149 | ZNF503-AS2 | 0.220062087129183  | 0.0454826850442338 |

|                 |            |                    |                    |
|-----------------|------------|--------------------|--------------------|
| ENSG00000170271 | FAXDC2     | 0.15449851099097   | 0.0454826850442338 |
| ENSG00000215021 | PHB2       | 0.108410194489328  | 0.0454826850442338 |
| ENSG00000242265 | PEG10      | 0.792224982648411  | 0.0454826850442338 |
| ENSG00000104267 | CA2        | 0.207713894332215  | 0.0454826850442338 |
| ENSG00000129562 | DAD1       | 0.140181939057752  | 0.0454826850442338 |
| ENSG00000132507 | EIF5A      | 0.140446150033658  | 0.0454826850442338 |
| ENSG00000168397 | ATG4B      | 0.130619387032191  | 0.0454826850442338 |
| ENSG00000226699 | AL360181.1 | 0.293527205732095  | 0.0454826850442338 |
| ENSG00000162384 | C1orf123   | 0.103200085285256  | 0.0454826850442338 |
| ENSG00000103168 | TAF1C      | 0.148365109453756  | 0.0467793841524275 |
| ENSG00000095906 | NUBP2      | 0.111902051719444  | 0.0467793841524275 |
| ENSG00000179262 | RAD23A     | 0.0993766041444736 | 0.0470710188796933 |
| ENSG00000161526 | SAP30BP    | 0.0892438978768329 | 0.0478558585704698 |
| ENSG00000132716 | DCAF8      | 0.0963598068828793 | 0.0480316506696637 |
| ENSG00000074964 | ARHGEF10L  | 0.159751367107678  | 0.0481683162637621 |
| ENSG00000004534 | RBM6       | 0.168714636463194  | 0.0489038268892948 |
| ENSG00000228923 | AP000355.1 | 0.296894259946723  | 0.0491766183892852 |
| ENSG00000119705 | SLIRP      | 0.14278553515333   | 0.0495983104621031 |
| ENSG00000104859 | CLASRP     | 0.126627401285138  | 0.0496363508635229 |
| ENSG00000099840 | IZUMO4     | 0.244458271387156  | 0.049862241465128  |
| ENSG00000132394 | EEFSEC     | 0.0897760641719469 | 0.049862241465128  |
| ENSG00000204653 | ASPDH      | 0.166888747652526  | 0.049862241465128  |



**Supplementary Table 8. Downregulated Gene Ontology pathways in carriers as compared to non-carriers of the HSD17B13 variant.**

| <b>Description</b>                                                    | <b>geneID</b>                                                                                                    | <b>Count</b> | <b>qvalue</b>        |
|-----------------------------------------------------------------------|------------------------------------------------------------------------------------------------------------------|--------------|----------------------|
| GO ACTIVATION OF IMMUNE RESPONSE                                      | IFI16/LYN/BTK/MAP3K1/PIK3CD/PTPRC/NFKB1/TRAF3/MYD88/NCKAP1L/RELB/BIRC3/CTSS/WIPF1/WIPF2/BCL2/ITGB2/VAV1/SYK/FCN1 | 20           | 2.16390504864883e-06 |
| GO POSITIVE REGULATION OF INNATE IMMUNE RESPONSE                      | IFI16/LYN/BTK/MAP3K1/NFKB1/TRAF3/MYD88/RELB/BIRC3/CTSS/HLA-E/ITGB2/VAV1/SYK/FCN1                                 | 15           | 4.66174538075426e-06 |
| GO ACTIVATION OF INNATE IMMUNE RESPONSE                               | IFI16/LYN/BTK/MAP3K1/NFKB1/TRAF3/MYD88/RELB/BIRC3/CTSS/ITGB2/SYK/FCN1                                            | 13           | 1.60899007283795e-05 |
| GO POSITIVE REGULATION OF LOCOMOTION                                  | DAB2/ETS1/LYN/HIF1A/ADAM9/PIK3CD/PTPRC/ICAM1/NRP1/NCKAP1L/FERMT3/KDR/CCR1/TGFB2/BCL2/DOCK7/TGFBR2/ADAM10         | 18           | 1.60899007283795e-05 |
| GO RAC GTPASE BINDING                                                 | CDKL5/RCC2/IQGAP1/EPS8/DOCK7/NCF2/FMNL1                                                                          | 7            | 1.71458245508568e-05 |
| GO REGULATION OF INNATE IMMUNE RESPONSE                               | IFI16/LYN/BTK/MAP3K1/NFKB1/TRAF3/MYD88/RELB/BIRC3/CTSS/HLA-E/ITGB2/VAV1/SYK/TAP1/FCN1                            | 16           | 3.48954286405353e-05 |
| GO POSITIVE REGULATION OF DEFENSE RESPONSE                            | IFI16/ETS1/LYN/BTK/MAP3K1/NFKB1/TRAF3/MYD88/RELB/BIRC3/CTSS/HLA-E/ITGB2/VAV1/SYK/FCN1                            | 16           | 3.89574703102597e-05 |
| GO IMMUNE RESPONSE REGULATING CELL SURFACE RECEPTOR SIGNALING PATHWAY | LYN/BTK/MAP3K1/PIK3CD/PTPRC/NFKB1/NCKAP1L/RELB/WIPF1/WIPF2/BCL2/VAV1/SYK/FCN1/NFATC3                             | 15           | 4.10062151581436e-05 |

|                                                     |                                                                                              |    |                      |
|-----------------------------------------------------|----------------------------------------------------------------------------------------------|----|----------------------|
| GO MEMBRANE MICRODOMAIN                             | CBL/LDHB/ATP2B1/LYN/BTK/PTPRC/ICAM1/BIRC3/KDR/LRP6/DLC1/SPRED1/TGFBR2/RTN4RL1                | 14 | 5.54146574580176e-05 |
| GO REGULATION OF CELL SHAPE                         | ICAM1/CSNK1G1/KDR/DLC1/WIPF1/WIPF2/EPS8/CDC42SE2/ITGB2/FMNL1                                 | 10 | 7.37178735919572e-05 |
| GO RHO GTPASE BINDING                               | CDKL5/RCC2/IQGAP1/EPS8/KIF3B/DOCK7/NCF2/FMNL1                                                | 8  | 7.37178735919572e-05 |
| GO B CELL RECEPTOR SIGNALING PATHWAY                | LYN/BTK/PIK3CD/PTPRC/NCKAP1L/BCL2/SYK                                                        | 7  | 7.37178735919572e-05 |
| GO INTEGRIN MEDIATED SIGNALING PATHWAY              | DAB2/ADAM9/RCC2/FERMT3/ITGB2/VAV1/SYK/ADAM10                                                 | 8  | 9.33416630044616e-05 |
| GO LEUKOCYTE ACTIVATION                             | LYN/ADAM9/BTK/PIK3CD/PTPRC/ICAM1/LCP1/RELB/HLA-E/RBPJ/BCL2/ITGB2/VAV1/SYK/TGFBR2/ADAM10      | 16 | 0.000112498324223003 |
| GO REGULATION OF CELL ADHESION MEDIATED BY INTEGRIN | LYN/ADAM9/NCKAP1L/FERMT3/TGFB2/SYK                                                           | 6  | 0.000143726371515479 |
| GO SIDE OF MEMBRANE                                 | SNX18/ATP2B1/LYN/ADAM9/ABL2/BTK/IQGAP1/PTPRC/ICAM1/TRAFF3/HLA-E/CCR1/SYK/TGFBR2/FCN1/RTN4RL1 | 16 | 0.000147479978911267 |
| GO MYELOID LEUKOCYTE ACTIVATION                     | LYN/ADAM9/PIK3CD/RELB/RBPJ/SYK/TGFBR2/ADAM10                                                 | 8  | 0.000302511799291137 |
| GO LEUKOCYTE CELL CELL ADHESION                     | PIK3CD/PTPRC/ICAM1/LCP1/FERMT3/RELB/HLA-E/CD44/BCL2/ITGB2/VAV1/SYK                           | 12 | 0.000303852229755125 |
| GO LEUKOCYTE MIGRATION                              | LYN/PIK3CD/ICAM1/NCKAP1L/SLC7A7/CD44/EPS8/CCR1/TGFBR2/ITGB2/VAV1/SYK                         | 12 | 0.000351545051677081 |

|                                                              |                                                                                            |    |                              |
|--------------------------------------------------------------|--------------------------------------------------------------------------------------------|----|------------------------------|
| GO CELLULAR RESPONSE TO EXTERNAL STIMULUS                    | IFI16/ATP2B1/LYN/HIF1A/MAP3K1/NFKB1/ICAM1/PRDM4/MYD88/SH3GLB1/ATG7/BCL2                    | 12 | 0.0003905<br>73558792<br>179 |
| GO INTEGRIN BINDING                                          | LYN/ADAM9/ICAM1/FERMT3/KDR/SYK/ADAM10/NPNT                                                 | 8  | 0.0004097<br>23799295<br>624 |
| GO PATTERN RECOGNITION RECEPTOR SIGNALING PATHWAY            | BTK/MAP3K1/TRAF3/MYD88/BIRC3/CTSS/ITGB2/FCN1                                               | 8  | 0.0005159<br>11111255<br>387 |
| GO CELL ADHESION MOLECULE BINDING                            | LYN/ADAM9/ICAM1/FERMT3/KDR/ITGB2/SYK/ADAM10/NPNT /CD200                                    | 10 | 0.0005262<br>17401501<br>241 |
| GO ANCHORIN G JUNCTION                                       | SENP1/DAB2/LYN/ADAM9/TJP1/IQGAP1/PTPRC/ICAM1/LCP1/NRP1/ZNF185/DLC1/CD44/DOCK7/ADAM10/CD200 | 16 | 0.0005283<br>52691765<br>687 |
| GO TOLL LIKE RECEPTOR SIGNALING PATHWAY                      | BTK/MAP3K1/TRAF3/MYD88/BIRC3/CTSS/ITGB2                                                    | 7  | 0.0008500<br>30629317<br>677 |
| GO POSITIVE REGULATION OF CELL ADHESION MEDIATED BY INTEGRIN | ADAM9/NCKAP1L/TGFB2/SYK                                                                    | 4  | 0.0009693<br>96802216<br>487 |
| GO SINGLE ORGANISM CELL ADHESION                             | ADAM9/PIK3CD/PTPRC/ICAM1/LCP1/FERMT3/RELB/LRP6/HLA-E/CD44/BCL2/ITGB2/VAV1/SYK/NPNT         | 15 | 0.0009693<br>96802216<br>487 |
| GO FC RECEPTOR SIGNALING PATHWAY                             | LYN/BTK/MAP3K1/NFKB1/NCKAP1L/WIPF1/WIPF2/VAV1/SYK /NFATC3                                  | 10 | 0.0010006<br>44101144<br>68  |
| GO CORTICAL CYTOSKELETON ORGANIZATION                        | EPB41L1/NCKAP1L/WIPF1/WIPF2/FMNL1                                                          | 5  | 0.0010006<br>44101144<br>68  |

|                                                                          |                                                                                        |    |                             |
|--------------------------------------------------------------------------|----------------------------------------------------------------------------------------|----|-----------------------------|
| GO REGULATI<br>ON OF<br>ERYTHROC<br>YTE<br>DIFFERENT<br>IATION           | SENP1/ETS1/LYN/HIF1A/NCKAP1L                                                           | 5  | 0.0010006<br>44101144<br>68 |
| GO REGULATI<br>ON OF<br>CELL<br>KILLING                                  | PTPRC/ICAM1/HLA-E/TGFB2/VAV1/TAP1                                                      | 6  | 0.0012186<br>42246319<br>99 |
| GO PEPTIDYL<br>TYROSINE<br>AUTOPHOS<br>PHORYLATI<br>ON                   | LYN/ABL2/BTK/KDR/SYK                                                                   | 5  | 0.0014027<br>70817203<br>48 |
| GO IMMUNE<br>EFFECTOR<br>PROCESS                                         | IFI16/LYN/PIK3CD/PTPRC/ICAM1/LCP1/NCKAP1L/RELB/WIPF<br>1/WIPF2/ATG7/BCL2/VAV1/SYK/FCN1 | 15 | 0.0014631<br>45383380<br>07 |
| GO PLASMA<br>MEMBRAN<br>E<br>RECEPTOR<br>COMPLEX                         | DAB2/LYN/TRAF3/EPS8/CSF2RB/ITGB2/SYK/TGFBR2/NPNT                                       | 9  | 0.0014631<br>45383380<br>07 |
| GO PROTEIN<br>TYROSINE<br>KINASE<br>ACTIVITY                             | LYN/ABL2/BTK/DSTYK/NRP1/KDR/CSF2RB/SYK/BAZ1B                                           | 9  | 0.0014631<br>45383380<br>07 |
| GO POSITIVE<br>REGULATI<br>ON OF<br>CELL<br>ADHESION                     | ETS1/LYN/ADAM9/PTPRC/NCKAP1L/KDR/HLA-<br>E/CD44/TGFB2/VAV1/SYK/TGFBR2/NPNT             | 13 | 0.0016325<br>63824442<br>47 |
| GO B CELL<br>HOMEOSTA<br>SIS                                             | LYN/HIF1A/NCKAP1L/BCL2                                                                 | 4  | 0.0016758<br>40856549<br>1  |
| GO RECEPTOR<br>COMPLEX                                                   | DAB2/LYN/NRP1/TRAF3/LRP6/CD44/EPS8/CSF2RB/ITGB2/SYK/<br>TGFBR2/NPNT                    | 12 | 0.0017439<br>28548549<br>47 |
| GO POSITIVE<br>REGULATI<br>ON OF<br>EPITHELIA<br>L CELL<br>MIGRATIO<br>N | ETS1/HIF1A/ADAM9/NRP1/KDR/TGFB2/TGFBR2                                                 | 7  | 0.0017753<br>24157770<br>94 |

|                                                              |                                                                                |    |                             |
|--------------------------------------------------------------|--------------------------------------------------------------------------------|----|-----------------------------|
| GO MYELOID CELL DIFFERENTIATION                              | IFI16/LYN/PIK3CD/NCKAP1L/RELB/RBPJ/RUNX1/TGFBR2/FLI1                           | 9  | 0.0022408<br>26165480<br>76 |
| GO INFLAMMATORY RESPONSE                                     | IFI16/LYN/HIF1A/ALOX5/PIK3CD/NFKB1/ICAM1/MYD88/RELB/CCR1/RBPJ/ITGB2/SYK/NFATC3 | 14 | 0.0023236<br>91443458<br>57 |
| GO CELL SUBSTRATE JUNCTION                                   | SENP1/DAB2/ADAM9/IQGAP1/PTPRC/ICAM1/LCP1/NRP1/ZNF185/DLC1/CD44/DOCK7/ADAM10    | 13 | 0.0023236<br>91443458<br>57 |
| GO NON MEMBRANE SPANNING PROTEIN TYROSINE KINASE ACTIVITY    | LYN/ABL2/BTK/SYK/BAZ1B                                                         | 5  | 0.0023236<br>91443458<br>57 |
| GO LYMPHOCYTE ACTIVATION                                     | BTK/PIK3CD/PTPRC/ICAM1/LCP1/RELB/HLA-E/RBPJ/BCL2/ITGB2/VAV1/SYK                | 12 | 0.0023236<br>91443458<br>57 |
| GO REGULATION OF ERK1 AND ERK2 CASCADE                       | LYN/P2RY1/DSTYK/ICAM1/NRP1/KDR/CD44/CCR1/SYK/NPNT                              | 10 | 0.0023236<br>91443458<br>57 |
| GO MORPHOGENESIS OF AN EPITHELIUM                            | HIF1A/LCP1/NRP1/LRP6/DLC1/LUZP1/RBPJ/COBL/IFT52/TGFB2/BCL2/TGFBR2/NPNT         | 13 | 0.0023469<br>04399913<br>36 |
| GO GRANULOCYTE MIGRATION                                     | PIK3CD/NCKAP1L/TGFB2/ITGB2/VAV1/SYK                                            | 6  | 0.0025056<br>36293844       |
| GO GTPASE BINDING                                            | RAB11FIP1/CDKL5/RCC2/IQGAP1/LCP1/EPS8/KIF3B/DOCK7/NCF2/CHM/FMNL1               | 11 | 0.0025056<br>36293844       |
| GO POSITIVE REGULATION OF RESPONSE TO EXTRACELLULAR STIMULUS | HIF1A/KDR/SH3GLB1/ATG7/SPTLC2                                                  | 5  | 0.0025573<br>83600803<br>99 |

|                                                                       |                                                                                      |    |                             |
|-----------------------------------------------------------------------|--------------------------------------------------------------------------------------|----|-----------------------------|
| GO REGULATI<br>ON OF<br>LEUKOCYT<br>E<br>MEDIATED<br>IMMUNITY         | LYN/BTK/PTPRC/ICAM1/HLA-E/VAV1/SYK/TAP1                                              | 8  | 0.0028276<br>47850525<br>05 |
| GO POSITIVE<br>REGULATI<br>ON OF<br>MAPK<br>CASCADE                   | ADAM9/MAP3K1/P2RY1/DSTYK/ICAM1/NRP1/PELI2/KDR/CD4<br>4/CCR1/MADD/TGFB2/SYK/NPNT      | 14 | 0.0028276<br>47850525<br>05 |
| GO RESPONSE<br>TO<br>GROWTH<br>FACTOR                                 | CBL/ADAM9/IQGAP1/P2RY1/DSTYK/NFKB1/NRP1/PRDM4/KD<br>R/PARD3/CD44/SPRED1/TGFB2/TGFBR2 | 14 | 0.0030340<br>69914609<br>16 |
| GO EXTRINSIC<br>COMPONEN<br>T OF<br>MEMBRAN<br>E                      | SNX18/LYN/ABL2/SNX30/BTK/IQGAP1/PIK3CD/EPB41L1/SYK/<br>FCN1                          | 10 | 0.0030661<br>97317839<br>01 |
| GO CELL<br>MATRIX<br>ADHESION                                         | ADAM9/RCC2/DLC1/CD44/BCL2/ITGB2/NPNT                                                 | 7  | 0.0031682<br>06136368<br>83 |
| GO LEUKOCYT<br>E<br>CHEMOTAX<br>IS                                    | PIK3CD/NCKAP1L/CCR1/TGFB2/ITGB2/VAV1/SYK                                             | 7  | 0.0031682<br>06136368<br>83 |
| GO PHOSPHAT<br>ASE<br>BINDING                                         | IQGAP1/TRAF3/CSRNP2/PARD3/SPRED1/BCL2/CTTNBP2NL/PP<br>P1R18                          | 8  | 0.0033325<br>61494963<br>21 |
| GO REGULATI<br>ON OF<br>LEUKOCYT<br>E<br>MEDIATED<br>CYTOTOXI<br>CITY | PTPRC/ICAM1/HLA-E/VAV1/TAP1                                                          | 5  | 0.0033885<br>93066855<br>67 |
| GO CELL<br>CHEMOTAX<br>IS                                             | PIK3CD/NRP1/NCKAP1L/CCR1/TGFB2/ITGB2/VAV1/SYK                                        | 8  | 0.0033885<br>93066855<br>67 |
| GO CELL<br>SUBSTRAT<br>E<br>ADHESION                                  | ADAM9/RCC2/FERMT3/DLC1/CD44/BCL2/ITGB2/NPNT                                          | 8  | 0.0033885<br>93066855<br>67 |
| GO POSITIVE<br>REGULATI                                               | ETS1/HIF1A/BTK/NCKAP1L/CCR1/RUNX1/SYK/TGFBR2                                         | 8  | 0.0033885<br>93066855<br>67 |

|                                                                       |                                                                               |    |                     |
|-----------------------------------------------------------------------|-------------------------------------------------------------------------------|----|---------------------|
| ON OF HEMOPOIESIS                                                     |                                                                               |    |                     |
| GO TRANSMEMBRANE RECEPTOR PROTEIN TYROSINE KINASE SIGNALING PATHWAY   | CBL/LYN/ABL2/BTK/IQGAP1/NRP1/NCKAP1L/KDR/EP8/SPRED1/VAV1/SYK/ADAM10/NCF2      | 14 | 0.00420930597925196 |
| GO CYTOPLASMIC SIDE OF MEMBRANE                                       | SNX18/ATP2B1/LYN/ABL2/BTK/IQGAP1/TRAF3/SYK                                    | 8  | 0.00420930597925196 |
| GO TUBE MORPHOGENESIS                                                 | HIF1A/NRP1/LRP6/DLC1/LUZP1/RBPJ/COBL/IFT52/BCL2/TGFBR2/NPNT                   | 11 | 0.00427229653343965 |
| GO CELL ADHESION MEDIATED BY INTEGRIN                                 | ADAM9/ICAM1/NPNT                                                              | 3  | 0.00433313772433583 |
| GO PRODUCTION OF MOLECULAR MEDIATOR INVOLVED IN INFLAMMATORY RESPONSE | LYN/ALOX5/SYK                                                                 | 3  | 0.00433313772433583 |
| GO RESPONSE TO EXTRACELLULAR STIMULUS                                 | IFI16/ATP2B1/LYN/ALOX5/ICAM1/OXCT1/PRDM4/SH3GLB1/ATG7/DNMT3A/HLCS/BCL2/TGFBR2 | 13 | 0.00434765258770204 |
| GO POSITIVE REGULATION OF ERK1 AND ERK2 CASCADE                       | P2RY1/DSTYK/ICAM1/NRP1/KDR/CD44/CCR1/NPNT                                     | 8  | 0.00457393334837671 |
| GO NEURAL TUBE                                                        | HIF1A/LRP6/DLC1/LUZP1/COBL/IFT52                                              | 6  | 0.00533043102539954 |

|                                                                                               |                                    |   |                             |
|-----------------------------------------------------------------------------------------------|------------------------------------|---|-----------------------------|
| FORMATIO<br>N                                                                                 |                                    |   |                             |
| GO FC<br>GAMMA<br>RECEPTOR<br>SIGNALING<br>PATHWAY                                            | LYN/NCKAP1L/WIPF1/WIPF2/VAV1/SYK   | 6 | 0.0055673<br>35526860<br>13 |
| GO<br>DENDRITIC<br>CELL<br>DIFFERENT<br>IATION                                                | LYN/RELB/RBPJ/TGFBR2               | 4 | 0.0055817<br>17232745<br>96 |
| GO<br>EXTRINSIC<br>COMPONEN<br>T OF<br>PLASMA<br>MEMBRAN<br>E                                 | SNX18/LYN/ABL2/BTK/IQGAP1/SYK/FCN1 | 7 | 0.0056516<br>12058238<br>42 |
| GO<br>PHOSPHATI<br>DYLINOSIT<br>OL 3 4 5<br>TRISPHOSP<br>HATE<br>BINDING                      | BTK/IQGAP1/PARD3/DAPP1             | 4 | 0.0060249<br>32164196<br>63 |
| GO<br>POSITIVE<br>REGULATI<br>ON OF<br>EPITHELIA<br>L TO<br>MESENCHY<br>MAL<br>TRANSITIO<br>N | DAB2/TGFB2/TGFBR2/BCL9L            | 4 | 0.0060249<br>32164196<br>63 |
| GO<br>EXTRINSIC<br>COMPONEN<br>T OF<br>CYTOPLAS<br>MIC SIDE<br>OF PLASMA<br>MEMBRAN<br>E      | SNX18/LYN/ABL2/BTK/IQGAP1/SYK      | 6 | 0.0061340<br>77450011<br>42 |
| GO<br>POSITIVE<br>REGULATI<br>ON OF B<br>CELL<br>DIFFERENT<br>IATION                          | BTK/NCKAP1L/SYK                    | 3 | 0.0061340<br>77450011<br>42 |



|                                                                               |                                                                 |    |                             |
|-------------------------------------------------------------------------------|-----------------------------------------------------------------|----|-----------------------------|
| GO<br>CYTOPLAS<br>MIC<br>REGION                                               | HIF1A/CDKL5/DLC1/WIPF1/PARD3/WIPF2/EPS8/COBL/KIF3B/F<br>MNL1    | 10 | 0.0061612<br>62868521<br>17 |
| GO<br>PEPTIDYL<br>TYROSINE<br>MODIFICAT<br>ION                                | LYN/ABL2/BTK/DSTYK/KDR/CSF2RB/SYK/BAZ1B                         | 8  | 0.0062811<br>61825589<br>6  |
| GO<br>MEMBRAN<br>E PROTEIN<br>PROTEOLY<br>SIS                                 | ADAM9/NFKB1/BACE2/ADAM10                                        | 4  | 0.0063232<br>30407280<br>95 |
| GO<br>LEUKOCYT<br>E<br>DIFFERENT<br>IATION                                    | IFI16/LYN/PIK3CD/PTPRC/RELB/RBPJ/BCL2/VAV1/SYK/TGFB<br>R2       | 10 | 0.0065404<br>94213654<br>17 |
| GO FC<br>EPSILON<br>RECEPTOR<br>SIGNALING<br>PATHWAY                          | LYN/BTK/MAP3K1/NFKB1/VAV1/SYK/NFATC3                            | 7  | 0.0065404<br>94213654<br>17 |
| GO<br>MYELOID<br>LEUKOCYT<br>E<br>MIGRATIO<br>N                               | PIK3CD/NCKAP1L/TGFB2/ITGB2/VAV1/SYK                             | 6  | 0.0065740<br>55808470<br>59 |
| GO<br>CELLULAR<br>RESPONSE<br>TO<br>EXTRACEL<br>LULAR<br>STIMULUS             | IFI16/ATP2B1/LYN/ICAM1/PRDM4/SH3GLB1/ATG7/BCL2                  | 8  | 0.0065740<br>55808470<br>59 |
| GO<br>PHAGOCYT<br>OSIS                                                        | LYN/NCKAP1L/WIPF1/WIPF2/CDC42SE2/VAV1/SYK/FCN1                  | 8  | 0.0067308<br>75961665<br>11 |
| GO<br>POSITIVE<br>REGULATI<br>ON OF<br>RESPONSE<br>TO<br>EXTERNAL<br>STIMULUS | ETS1/HIF1A/NRP1/NCKAP1L/KDR/SH3GLB1/ATG7/CCR1/SPTL<br>C2/ADAM10 | 10 | 0.0070540<br>33969112<br>91 |
| GO<br>PROTEIN<br>AUTOPHOS<br>PHORYLATI<br>ON                                  | LYN/CDKL5/ABL2/BTK/SLK/CSNK1G1/KDR/SYK                          | 8  | 0.0070540<br>33969112<br>91 |

|                                                |                                                                              |    |                             |
|------------------------------------------------|------------------------------------------------------------------------------|----|-----------------------------|
| GO POSITIVE REGULATION OF CELL CELL ADHESION   | ETS1/LYN/PTPRC/NCKAP1L/HLA-E/CD44/VAV1/SYK/TGFBR2                            | 9  | 0.0072305<br>81699215<br>04 |
| GO ANTIGEN RECEPTOR MEDIATED SIGNALING PATHWAY | LYN/BTK/PIK3CD/PTPRC/NFKB1/NCKAP1L/BCL2/SYK                                  | 8  | 0.0075707<br>13507762<br>04 |
| GO POSITIVE REGULATION OF KINASE ACTIVITY      | LYN/ADAM9/MAP3K1/IQGAP1/PTPRC/DSTYK/NCKAP1L/PFKFB2/MADD/MMD/TGFB2/SYK/TGFBR2 | 13 | 0.0075707<br>13507762<br>04 |
| GO SITE OF POLARIZED GROWTH                    | CDKL5/IQGAP1/NRP1/PARD3/EPS8/COBL/DOCK7                                      | 7  | 0.0078825<br>74897537<br>29 |
| GO EXTRACELLULAR STRUCTURE ORGANIZATION        | VCAN/ICAM1/LCP1/KDR/CTSS/CD44/TGFB2/ITGB2/ADAM10/NPNT                        | 10 | 0.0083416<br>50341088<br>33 |
| GO ACTIN FILAMENT                              | IQGAP1/LCP1/WIPF1/WIPF2/COBL                                                 | 5  | 0.0083416<br>50341088<br>33 |
| GO RESPONSE TO OXYGEN LEVELS                   | ETS1/HIF1A/ALOX5/ICAM1/ATG7/DNMT3A/RBPJ/CYB5R4/TGFB2/BCL2                    | 10 | 0.0093648<br>45378694<br>24 |
| GO REGULATION OF TYPE I INTERFERON PRODUCTION  | IFI16/NFKB1/TRAF3/MYD88/RELB/SYK                                             | 6  | 0.0095980<br>37257633<br>55 |
| GO RUFFLE                                      | CDKL5/IQGAP1/LCP1/DLC1/WIPF1/EPS8/COBL                                       | 7  | 0.0098469<br>55372380<br>35 |
| GO REGULATION OF HEMOPOIESIS                   | SENP1/ETS1/LYN/HIF1A/BTK/NCKAP1L/CCR1/RUNX1/SYK/TGFBR2                       | 10 | 0.0100234<br>62958592<br>4  |

|                                                                  |                                                                      |    |                            |
|------------------------------------------------------------------|----------------------------------------------------------------------|----|----------------------------|
| GO VASCULAR ENDOTHELIAL GROWTH FACTOR RECEPTOR SIGNALING PATHWAY | NRP1/NCKAP1L/KDR/VAV1/NCF2                                           | 5  | 0.0102337<br>48375952<br>5 |
| GO DEATH RECEPTOR BINDING                                        | PRDM4/MYD88/MADD                                                     | 3  | 0.0102569<br>53738326<br>4 |
| GO NEGATIVE REGULATION OF CELL KILLING                           | PTPRC/HLA-E/TAP1                                                     | 3  | 0.0102569<br>53738326<br>4 |
| GO REGULATION OF DEPHOSPHORYLATION                               | IQGAP1/NCKAP1L/DLC1/CSRNP2/SPRED1/TGFB2/NPNT                         | 7  | 0.0103492<br>80437317<br>1 |
| GO POSITIVE REGULATION OF AUTOPHAGY                              | HIF1A/KDR/SH3GLB1/ATG7/SPTLC2                                        | 5  | 0.0103492<br>80437317<br>1 |
| GO POSITIVE REGULATION OF CARBOHYDRATE METABOLIC PROCESS         | HIF1A/P2RY1/NFKB1/PFKFB2/ARFGEF1                                     | 5  | 0.0103492<br>80437317<br>1 |
| GO RESPONSE TO MECHANICAL STIMULUS                               | ETS1/HIF1A/MAP3K1/P2RY1/NFKB1/MYD88/TGFBR2/DENND5<br>B               | 8  | 0.0106900<br>23170165<br>6 |
| GO POSITIVE REGULATION OF PROTEIN SECRETION                      | HIF1A/ADAM9/OXCT1/PFKFB2/HLA-E/TGFB2/SYK/FCN1                        | 8  | 0.0109232<br>76583323<br>3 |
| GO REGULATION OF HOMEOSTA                                        | SENP1/ETS1/LYN/HIF1A/PTPRC/OXCT1/NCKAP1L/KDR/TGFB2<br>/BCL2/SYK/NEK7 | 12 | 0.0113697<br>62092292<br>6 |

|                                                                               |                                            |   |                            |
|-------------------------------------------------------------------------------|--------------------------------------------|---|----------------------------|
| TIC<br>PROCESS                                                                |                                            |   |                            |
| GO<br>NEGATIVE<br>REGULATI<br>ON OF<br>DEPHOSPH<br>ORYLATIO<br>N              | IQGAP1/NCKAP1L/CSRNP2/SPRED1/TGFB2         | 5 | 0.0119238<br>84018250<br>7 |
| GO<br>REGULATI<br>ON OF<br>EPITHELIA<br>L CELL<br>MIGRATIO<br>N               | ETS1/HIF1A/ADAM9/NRP1/KDR/TGFB2/TGFBR2     | 7 | 0.0126529<br>27872274<br>9 |
| GO<br>EMBRYONI<br>C<br>HEMOPOIE<br>SIS                                        | HIF1A/KDR/TGFBR2                           | 3 | 0.0128250<br>19412156      |
| GO<br>MYELOID<br>DENDRITIC<br>CELL<br>DIFFERENT<br>IATION                     | RELB/RBPJ/TGFBR2                           | 3 | 0.0128250<br>19412156      |
| GO<br>NEGATIVE<br>REGULATI<br>ON OF<br>IMMUNE<br>RESPONSE                     | IFI16/LYN/PTPRC/HLA-E/TGFB2/TAP1           | 6 | 0.0128250<br>19412156      |
| GO<br>REGULATI<br>ON OF B<br>CELL<br>ACTIVATIO<br>N                           | LYN/BTK/PTPRC/NCKAP1L/BCL2/SYK             | 6 | 0.0128250<br>19412156      |
| GO<br>POSITIVE<br>REGULATI<br>ON OF<br>MYELOID<br>CELL<br>DIFFERENT<br>IATION | ETS1/HIF1A/NCKAP1L/CCR1/RUNX1              | 5 | 0.0133139<br>00399068<br>9 |
| GO<br>RESPONSE<br>TO<br>CARBOHYD<br>RATE                                      | LYN/HIF1A/CALCRL/NFKB1/ICAM1/PFKFB2/TGFBR2 | 7 | 0.0133139<br>00399068<br>9 |

|                                                       |                                                                          |    |                            |
|-------------------------------------------------------|--------------------------------------------------------------------------|----|----------------------------|
| GO T CELL DIFFERENTIATION                             | PIK3CD/PTPRC/RELB/BCL2/VAV1/SYK                                          | 6  | 0.0135870<br>33534723<br>5 |
| GO TUMOR NECROSIS FACTOR RECEPTOR SUPERFAMILY BINDING | TRAF3/PRDM4/MYD88/MADD                                                   | 4  | 0.0135870<br>33534723<br>5 |
| GO NEGATIVE REGULATION OF HYDROLASE ACTIVITY          | IFI16/RCC2/IQGAP1/NCKAP1L/BIRC3/CSRNP2/CD44/TNFAIP8/SPRED1/TGFB2/ARFGEF1 | 11 | 0.0136197<br>60963961      |
| GO REGULATION OF CELLULAR COMPONENT SIZE              | HIF1A/CDKL5/ICAM1/NRP1/NCKAP1L/WIPF1/WIPF2/EPS8/VAV1/ARFGEF1             | 10 | 0.0136197<br>60963961      |
| GO MRNA TRANSCRIPTION                                 | HIF1A/LMO2/HIPK3                                                         | 3  | 0.0136197<br>60963961      |
| GO REGULATION OF RUFFLE ASSEMBLY                      | RCC2/ICAM1/COBL                                                          | 3  | 0.0136197<br>60963961      |
| GO RECEPTOR SIGNALING PROTEIN ACTIVITY                | LYN/MAP3K1/SLK/KDR/TGFB2/SYK/TGFBR2                                      | 7  | 0.0138999<br>12768603<br>1 |
| GO HEART DEVELOPMENT                                  | HIF1A/CALCRL/OXCT1/NRP1/LRP6/DLC1/LUZP1/RBPJ/IFT52/TGFB2/TGFBR2/BAZ1B    | 12 | 0.0141817<br>34973645<br>1 |
| GO MEMBRANE PROTEIN ECTODOMAIN PROTEOLYSIS            | ADAM9/BACE2/ADAM10                                                       | 3  | 0.0150548<br>41986328<br>9 |
| GO REGULATION OF B CELL DIFFERENTIATION               | BTK/NCKAP1L/SYK                                                          | 3  | 0.0150548<br>41986328<br>9 |
| GO REGULATION OF                                      | HIF1A/CDKL5/ALOX5/P2RY1/ICAM1/NRP1/NCKAP1L/WIPF1/WIPF2/EPS8/VAV1/ARFGEF1 | 12 | 0.0150548<br>41986328<br>9 |

|                                                     |                                                                 |    |                            |
|-----------------------------------------------------|-----------------------------------------------------------------|----|----------------------------|
| ANATOMICAL STRUCTURE SIZE                           |                                                                 |    |                            |
| GO PHAGOCYTOTIC VESICLE                             | RAB11FIP1/HLA-E/SYK/NCF2/FMNL1                                  | 5  | 0.0150548<br>41986328<br>9 |
| GO PLASMA MEMBRANE RAFT                             | CBL/LRP6/DLC1/SPRED1/TGFBR2                                     | 5  | 0.0150548<br>41986328<br>9 |
| GO POSITIVE REGULATION OF B CELL ACTIVATION         | BTK/PTPRC/NCKAP1L/BCL2/SYK                                      | 5  | 0.0150548<br>41986328<br>9 |
| GO LYMPHOCYTE HOMEOSTASIS                           | LYN/HIF1A/NCKAP1L/BCL2                                          | 4  | 0.0150548<br>41986328<br>9 |
| GO POSITIVE REGULATION OF STEM CELL DIFFERENTIATION | DAB2/TGFB2/TGFBR2/BCL9L                                         | 4  | 0.0150548<br>41986328<br>9 |
| GO REGULATION OF ADHERENS JUNCTION ORGANIZATION     | RCC2/SLK/KDR/DLC1                                               | 4  | 0.0150548<br>41986328<br>9 |
| GO POSITIVE REGULATION OF CELL DEVELOPMENT          | DAB2/LYN/HIF1A/CDKL5/ABL2/NRP1/COBL/MMD/TGFB2/BCL2/TGFBR2/BCL9L | 12 | 0.0150548<br>41986328<br>9 |
| GO TUBE FORMATION                                   | HIF1A/LRP6/DLC1/LUZP1/COBL/IFT52                                | 6  | 0.0150548<br>41986328<br>9 |
| GO ADAPTIVE IMMUNE RESPONSE                         | LYN/BTK/PIK3CD/ICAM1/RELB/CTSS/HLA-E/SYK/TAP1                   | 9  | 0.0157670<br>17631212<br>2 |
| GO POSITIVE REGULATION                              | NCKAP1L/HLA-E/SYK/TGFBR2                                        | 4  | 0.0157670<br>17631212<br>2 |

|                                                       |                                                  |   |                    |
|-------------------------------------------------------|--------------------------------------------------|---|--------------------|
| ON OF ALPHA BETA T CELL ACTIVATION                    |                                                  |   |                    |
| GO POSITIVE REGULATION OF ERYTHROCYTE DIFFERENTIATION | ETS1/HIF1A/NCKAP1L                               | 3 | 0.0157670176312122 |
| GO RECEPTOR MEDIATED ENDOCYTOSIS                      | DAB2/GPR107/CALCRL/LRP6/ITGB2/SYK/TGFBR2/MSR1    | 8 | 0.0158934845849071 |
| GO POSITIVE REGULATION OF LEUKOCYTE DIFFERENTIATION   | BTK/NCKAP1L/CCR1/RUNX1/SYK/TGFBR2                | 6 | 0.0163385394545017 |
| GO ANGIOGENESIS                                       | ETS1/HIF1A/CALCRL/NRP1/KDR/RBPJ/TGFB2/SYK/TGFBR2 | 9 | 0.0166781045986848 |
| GO REGULATION OF MYELOID CELL DIFFERENTIATION         | SENP1/ETS1/LYN/HIF1A/NCKAP1L/CCR1/RUNX1          | 7 | 0.0166781045986848 |
| GO ENDOTHELIUM DEVELOPMENT                            | TJP1/ICAM1/NRP1/KDR/RBPJ                         | 5 | 0.0166781045986848 |
| GO REGULATION OF CELL MATRIX ADHESION                 | RCC2/SLK/KDR/DLC1/BCL2                           | 5 | 0.0166781045986848 |
| GO CELL SUBSTRATE ADHERENS JUNCTION ASSEMBLY          | RCC2/DLC1/BCL2                                   | 3 | 0.0166781045986848 |

|                                                   |                                                           |    |                    |
|---------------------------------------------------|-----------------------------------------------------------|----|--------------------|
| GO MESENCHYMAL CELL DIFFERENTIATION               | HIF1A/NRP1/LRP6/RBPJ/TGFB2/BCL2                           | 6  | 0.0166781045986848 |
| GO MORPHOGENESIS OF EMBRYONIC EPITHELIUM          | HIF1A/LRP6/DLC1/LUZP1/COBL/IFT52                          | 6  | 0.0166781045986848 |
| GO POSITIVE REGULATION OF VASCULATURE DEVELOPMENT | ETS1/HIF1A/KDR/RUNX1/ITGB2/TGFBR2                         | 6  | 0.0166781045986848 |
| GO CELL GROWTH                                    | IQGAP1/NRP1/COBL/TGFB2/BCL2/TGFBR2                        | 6  | 0.0172104814816854 |
| GO POSITIVE REGULATION OF LEUKOCYTE PROLIFERATION | LYN/PTPRC/NCKAP1L/HLA-E/BCL2/SYK                          | 6  | 0.0176986913614431 |
| GO ALPHA BETA T CELL ACTIVATION                   | RELB/HLA-E/BCL2/SYK                                       | 4  | 0.0176986913614431 |
| GO REGULATION OF LYMPHOCYTE APOPTOTIC PROCESS     | LYN/HIF1A/BTK/TGFB2                                       | 4  | 0.0176986913614431 |
| GO REGULATION OF IMMUNE EFFECTOR PROCESS          | LYN/BTK/PTPRC/ICAM1/TRAF3/BIRC3/HLA-E/TGFB2/VAV1/SYK/TAP1 | 11 | 0.0184023271303667 |
| GO REGULATION OF B CELL                           | LYN/PTPRC/NCKAP1L/BCL2                                    | 4  | 0.01870560146342   |



|                                                               |                                               |   |                    |
|---------------------------------------------------------------|-----------------------------------------------|---|--------------------|
| PROLIFERATION                                                 |                                               |   |                    |
| GO CELL ACTIVATION INVOLVED IN IMMUNE RESPONSE                | LYN/PIK3CD/ICAM1/LCP1/RELB/SYK                | 6 | 0.0192013851214373 |
| GO STEM CELL DIFFERENTIATION                                  | HIF1A/PTPRC/NRP1/LRP6/RBPJ/TGFB2/BCL2         | 7 | 0.0194072536767083 |
| GO EPITHELIAL TO MESENCHYMAL TRANSITION                       | HIF1A/LRP6/RBPJ/TGFB2                         | 4 | 0.0195626156821723 |
| GO RESPONSE TO NUTRIENT                                       | ATP2B1/ALOX5/OXCT1/PRDM4/DNMT3A/HLCS/TGFBR2   | 7 | 0.0195626156821723 |
| GO MYELOID DENDRITIC CELL ACTIVATION                          | RELB/RBPJ/TGFBR2                              | 3 | 0.0195626156821723 |
| GO TRANSFORMING GROWTH FACTOR BETA RECEPTOR SIGNALING PATHWAY | CBL/ADAM9/PARD3/TGFB2/TGFBR2                  | 5 | 0.0195626156821723 |
| GO MYELOID LEUKOCYTE DIFFERENTIATION                          | IFI16/PIK3CD/RELB/RBPJ/TGFBR2                 | 5 | 0.0203636566419501 |
| GO REGULATION OF AUTOPHAGY                                    | IFI16/HIF1A/ABL2/KDR/SH3GLB1/ATG7/BCL2/SPTLC2 | 8 | 0.0207196864852302 |
| GO CONNECTIVE TISSUE DEVELOPMENT                              | HIF1A/OXCT1/LRP6/CD44/RUNX1/TGFB2/TGFBR2      | 7 | 0.0209037533368671 |

|                                                                  |                                                              |    |                            |
|------------------------------------------------------------------|--------------------------------------------------------------|----|----------------------------|
| GO<br>CELLULAR<br>RESPONSE<br>TO<br>OXYGEN<br>LEVELS             | HIF1A/ICAM1/ATG7/DNMT3A/RBPJ/BCL2                            | 6  | 0.0209461<br>95618177<br>2 |
| GO<br>SUBSTRAT<br>E<br>DEPENDEN<br>T CELL<br>MIGRATIO<br>N       | PTPRC/NRP1/FMNL1                                             | 3  | 0.0211261<br>87333362<br>7 |
| GO<br>NEGATIVE<br>REGULATI<br>ON OF<br>DEFENSE<br>RESPONSE       | IFI16/ETS1/CALCRL/NFKB1/HLA-E/TAP1                           | 6  | 0.0214340<br>94193207<br>9 |
| GO<br>POSITIVE<br>REGULATI<br>ON OF<br>CELL<br>ACTIVATIO<br>N    | LYN/BTK/PTPRC/NCKAP1L/HLA-E/BCL2/VAV1/SYK/TGFBR2             | 9  | 0.0221905<br>38140291<br>4 |
| GO<br>REGULATI<br>ON OF<br>ACTIN<br>FILAMENT<br>BASED<br>PROCESS | ABL2/ICAM1/NCKAP1L/DLC1/WIPF1/WIPF2/EPS8/TGFB2/ARF<br>GEF1   | 9  | 0.0221905<br>38140291<br>4 |
| GO<br>CARTILAGE<br>DEVELOPM<br>ENT                               | HIF1A/LRP6/CD44/RUNX1/TGFB2/TGFBR2                           | 6  | 0.0233641<br>42681975<br>2 |
| GO<br>LEUKOCYT<br>E<br>HOMEOSTA<br>SIS                           | LYN/HIF1A/NCKAP1L/BCL2                                       | 4  | 0.0233654<br>85496392<br>2 |
| GO<br>REGULATI<br>ON OF<br>CELL CELL<br>ADHESION                 | ETS1/LYN/PTPRC/NCKAP1L/FERMT3/HLA-<br>E/CD44/VAV1/SYK/TGFBR2 | 10 | 0.0240539<br>80089845<br>7 |
| GO<br>NEURAL<br>TUBE<br>DEVELOPM<br>ENT                          | HIF1A/LRP6/DLC1/LUZP1/COBL/IFT52                             | 6  | 0.0245683<br>05793880<br>6 |

|                                                                              |                                                             |    |                    |
|------------------------------------------------------------------------------|-------------------------------------------------------------|----|--------------------|
| GO DEVELOPMENTAL GROWTH INVOLVED IN MORPHOGENESIS                            | IQGAP1/NRP1/LRP6/COBL/TGFBR2                                | 5  | 0.0268415700809074 |
| GO REGULATION OF REACTIVE OXYGEN SPECIES METABOLIC PROCESS                   | HIF1A/ICAM1/BCL2/ITGB2/SYK/TGFBR2                           | 6  | 0.0268415700809074 |
| GO POSITIVE REGULATION OF SMOOTH MUSCLE CELL MIGRATION                       | NRP1/BCL2/DOCK7                                             | 3  | 0.0269274092061115 |
| GO PROTEIN COMPLEX INVOLVED IN CELL ADHESION                                 | LYN/ITGB2/NPNT                                              | 3  | 0.0269274092061115 |
| GO REGULATION OF PROTEIN SECRETION                                           | RAB11FIP1/LYN/HIF1A/ADAM9/OXCT1/PFKFB2/HLA-E/TGFB2/SYK/FCN1 | 10 | 0.0280319710590896 |
| GO INNATE IMMUNE RESPONSE ACTIVATING CELL SURFACE RECEPTOR SIGNALING PATHWAY | LYN/NFKB1/RELB/SYK/FCN1                                     | 5  | 0.0284152017967018 |
| GO LYMPHOCYTE DIFFERENTIATION                                                | PIK3CD/PTPRC/RELB/RBPJ/BCL2/VAV1/SYK                        | 7  | 0.0289388639090284 |
| GO CELLULAR RESPONSE TO GLUCOSE                                              | IFI16/SH3GLB1/BCL2                                          | 3  | 0.0289495330221689 |

|                                                         |                                                               |    |                            |
|---------------------------------------------------------|---------------------------------------------------------------|----|----------------------------|
| STARVATION                                              |                                                               |    |                            |
| GO REGULATION OF ACTIN FILAMENT LENGTH                  | ICAM1/NCKAP1L/WIPF1/WIPF2/EPS8/ARFGEF1                        | 6  | 0.0293602<br>73928732      |
| GO MYD88 DEPENDENT TOLL LIKE RECEPTOR SIGNALING PATHWAY | BTK/MAP3K1/MYD88                                              | 3  | 0.0313844<br>77030769<br>1 |
| GO REGULATION OF EPITHELIAL TO MESENCHYMAL TRANSITION   | DAB2/TGFB2/TGFBR2/BCL9L                                       | 4  | 0.0324906<br>45087111<br>5 |
| GO ANTIGEN PROCESSING AND PRESENTATION                  | ICAM1/RELB/CTSS/HLA-E/KIF3B/TAP1/NCF2                         | 7  | 0.0329436<br>56216358<br>7 |
| GO POSITIVE REGULATION OF HOMEOSTATIC PROCESS           | ETS1/HIF1A/OXCT1/NCKAP1L/TGFB2/SYK/NEK7                       | 7  | 0.0331777<br>10065961<br>1 |
| GO WOUND HEALING                                        | ETS1/LYN/HIF1A/P2RY1/LCP1/FERMT3/TGFB2/VAV1/SYK/TGFB2/C6orf89 | 11 | 0.0331777<br>10065961<br>1 |
| GO SIGNAL TRANSDUCTION BY PROTEIN PHOSPHORYLATION       | LYN/MAP3K1/NFKB1/SLK/KDR/CSF2RB/SPRED1/TGFB2/SYK/TGFB2        | 10 | 0.0331777<br>10065961<br>1 |
| GO REGULATION OF ALPHA BETA T CELL ACTIVATION           | NCKAP1L/HLA-E/SYK/TGFBR2                                      | 4  | 0.0331777<br>10065961<br>1 |

|                                                                                                           |                                                            |   |                            |
|-----------------------------------------------------------------------------------------------------------|------------------------------------------------------------|---|----------------------------|
| GO REGULATI<br>ON OF<br>CELL<br>JUNCTION<br>ASSEMBLY                                                      | RCC2/SLK/KDR/DLC1                                          | 4 | 0.0331777<br>10065961<br>1 |
| GO<br>POSITIVE<br>REGULATI<br>ON OF<br>CELL<br>MORPHOGE<br>NESIS<br>INVOLVED<br>IN<br>DIFFERENT<br>IATION | DAB2/CDKL5/NRP1/TGFB2/TGFBR2/BCL9L                         | 6 | 0.0337020<br>57657421<br>2 |
| GO<br>NEGATIVE<br>REGULATI<br>ON OF<br>OSSIFICATI<br>ON                                                   | HIF1A/CCR1/RBPJ/BCL2                                       | 4 | 0.0346091<br>47143379<br>4 |
| GO<br>REGULATI<br>ON OF<br>SMALL<br>GTPASE<br>MEDIATED<br>SIGNAL<br>TRANSDUC<br>TION                      | ARHGAP30/DLC1/ARHGEF3/MADD/TGFB2/VAV1/ARHGAP25/<br>ARFGEF1 | 8 | 0.0350534<br>51118342<br>2 |
| GO<br>ADHERENS<br>JUNCTION<br>ASSEMBLY                                                                    | RCC2/DLC1/BCL2                                             | 3 | 0.0350534<br>51118342<br>2 |
| GO<br>CELLULAR<br>RESPONSE<br>TO BIOTIC<br>STIMULUS                                                       | LYN/HIF1A/ADAM9/NFKB1/ICAM1/SYK                            | 6 | 0.0350534<br>51118342<br>2 |
| GO<br>REGULATI<br>ON OF<br>LYMPHOCY<br>TE<br>MEDIATED<br>IMMUNITY                                         | BTK/PTPRC/HLA-E/VAV1/TAP1                                  | 5 | 0.0353271<br>60887319<br>9 |
| GO I<br>KAPPAB<br>KINASE NF<br>KAPPAB<br>SIGNALING                                                        | BTK/NFKB1/RELB/BIRC3                                       | 4 | 0.0353271<br>60887319<br>9 |

|                                                                                   |                                                   |   |                            |
|-----------------------------------------------------------------------------------|---------------------------------------------------|---|----------------------------|
| GO<br>POSITIVE<br>REGULATI<br>ON OF<br>TYPE I<br>INTERFERO<br>N<br>PRODUCTI<br>ON | IFI16/NFKB1/MYD88/SYK                             | 4 | 0.0353271<br>60887319<br>9 |
| GO<br>REGULATI<br>ON OF<br>NATURAL<br>KILLER<br>CELL<br>MEDIATED<br>IMMUNITY      | HLA-E/VAV1/TAP1                                   | 3 | 0.0372447<br>92648919<br>7 |
| GO<br>PHOSPHATI<br>DYLINOSIT<br>OL<br>PHOSPHAT<br>E BINDING                       | SNX18/BTK/IQGAP1/PARD3/DAPP1                      | 5 | 0.0372447<br>92648919<br>7 |
| GO<br>RESPONSE<br>TO<br>INTERLEUK<br>IN 1                                         | ETS1/HIF1A/NFKB1/ICAM1/MYD88                      | 5 | 0.0372447<br>92648919<br>7 |
| GO<br>ENDOTHELI<br>AL CELL<br>DIFFERENT<br>IATION                                 | TJP1/ICAM1/NRP1/RBPJ                              | 4 | 0.0382481<br>61953607<br>6 |
| GO<br>RESPONSE<br>TO<br>FIBROBLAS<br>T GROWTH<br>FACTOR                           | CBL/IQGAP1/DSTYK/CD44/SPRED1                      | 5 | 0.0382481<br>61953607<br>6 |
| GO CELL<br>LEADING<br>EDGE                                                        | ATP2B1/CDKL5/IQGAP1/LCP1/SLK/DLC1/WIPF1/EPS8/COBL | 9 | 0.0391965<br>27935072      |
| GO<br>NEGATIVE<br>REGULATI<br>ON OF<br>LYMPHOCY<br>TE<br>MEDIATED<br>IMMUNITY     | PTPRC/HLA-E/TAP1                                  | 3 | 0.0391965<br>27935072      |
| GO<br>CELLULAR<br>RESPONSE<br>TO                                                  | HIF1A/CALCRL/NFKB1/ICAM1                          | 4 | 0.0411497<br>86229666<br>7 |

|                                                                                       |                                                   |   |                            |
|---------------------------------------------------------------------------------------|---------------------------------------------------|---|----------------------------|
| CARBOHYD<br>RATE<br>STIMULUS                                                          |                                                   |   |                            |
| GO<br>REGULATI<br>ON OF<br>CELLULAR<br>RESPONSE<br>TO<br>GROWTH<br>FACTOR<br>STIMULUS | DAB2/HIF1A/DSTYK/RBPJ/TGFBR2/NPNT/BCL9L           | 7 | 0.0411497<br>86229666<br>7 |
| GO<br>PROTEIN<br>PHOSPHAT<br>ASE<br>BINDING                                           | IQGAP1/TRAF3/PARD3/BCL2/CTTNBP2NL                 | 5 | 0.0411497<br>86229666<br>7 |
| GO GLIAL<br>CELL<br>MIGRATIO<br>N                                                     | VCAN/P2RY1/TGFB2                                  | 3 | 0.0411497<br>86229666<br>7 |
| GO<br>POSITIVE<br>REGULATI<br>ON OF<br>ALPHA<br>BETA T<br>CELL<br>DIFFERENT<br>IATION | NCKAP1L/SYK/TGFBR2                                | 3 | 0.0411497<br>86229666<br>7 |
| GO<br>POSITIVE<br>REGULATI<br>ON OF B<br>CELL<br>PROLIFERA<br>TION                    | PTPRC/NCKAP1L/BCL2                                | 3 | 0.0411497<br>86229666<br>7 |
| GO<br>REGULATI<br>ON OF<br>PROTEIN<br>POLYMERI<br>ZATION                              | ICAM1/NCKAP1L/WIPF1/WIPF2/EP8/ARFGEF1             | 6 | 0.0417968<br>78600447<br>2 |
| GO<br>FOREBRAIN<br>DEVELOPM<br>ENT                                                    | PHLPP2/ETS1/HIF1A/NRP1/LRP6/DLC1/BTBD3/RBPJ/DOCK7 | 9 | 0.0418154<br>77158061<br>6 |
| GO<br>POSITIVE<br>REGULATI<br>ON OF<br>CHEMOTAX<br>IS                                 | NRP1/NCKAP1L/KDR/CCR1/ADAM10                      | 5 | 0.0418154<br>77158061<br>6 |

|                                                                     |                                                                  |    |                            |
|---------------------------------------------------------------------|------------------------------------------------------------------|----|----------------------------|
| GO REGULATI<br>ON OF<br>CELL<br>SUBSTRAT<br>E<br>ADHESION           | RCC2/SLK/KDR/DLC1/BCL2/NPNT                                      | 6  | 0.0423701<br>27598852<br>6 |
| GO ACTIN<br>FILAMENT<br>BINDING                                     | ABL2/LCP1/WIPF1/WIPF2/FMNL1                                      | 5  | 0.0428907<br>98858835<br>6 |
| GO<br>NEGATIVE<br>REGULATI<br>ON OF<br>INNATE<br>IMMUNE<br>RESPONSE | IFI16/HLA-E/TAP1                                                 | 3  | 0.0431370<br>10762343<br>9 |
| GO<br>REGULATI<br>ON OF<br>LEUKOCYT<br>E<br>DIFFERENT<br>IATION     | LYN/BTK/NCKAP1L/CCR1/RUNX1/SYK/TGFBR2                            | 7  | 0.0432725<br>55024913<br>8 |
| GO<br>RESPONSE<br>TO TUMOR<br>NECROSIS<br>FACTOR                    | ADAM9/NFKB1/ICAM1/TRAF3/BIRC3/ADAM10/NPNT                        | 7  | 0.0440807<br>10827947<br>3 |
| GO<br>RESPONSE<br>TO<br>ALCOHOL                                     | ETS1/ATP2B1/HIF1A/ICAM1/OXCT1/LRP6/EP8/DNMT3A/TGF<br>BR2         | 9  | 0.0442437<br>00325604<br>6 |
| GO<br>DEVELOPM<br>ENTAL<br>CELL<br>GROWTH                           | IQGAP1/NRP1/COBL/TGFBR2                                          | 4  | 0.0442437<br>00325604<br>6 |
| GO<br>DIENCEPHA<br>LON<br>DEVELOPM<br>ENT                           | ETS1/NRP1/LRP6/RBPJ                                              | 4  | 0.0442437<br>00325604<br>6 |
| GO<br>RESPONSE<br>TO DRUG                                           | LYN/HIF1A/ICAM1/OXCT1/ABCD3/NCKAP1L/DNMT3A/TGFB2<br>/BCL2/TGFBR2 | 10 | 0.0443508<br>31326301<br>9 |
| GO<br>NEGATIVE<br>REGULATI<br>ON OF<br>NATURAL<br>KILLER<br>CELL    | HLA-E/TAP1                                                       | 2  | 0.0445045<br>27666124<br>7 |



|                                              |                                                  |   |                            |
|----------------------------------------------|--------------------------------------------------|---|----------------------------|
| MEDIATED IMMUNITY                            |                                                  |   |                            |
| GO TRACHEA MORPHOGENESIS                     | LRP6/TGFBR2                                      | 2 | 0.0445045<br>27666124<br>7 |
| GO NEGATIVE REGULATION OF GROWTH             | HIF1A/CRLF3/NRP1/PRDM4/TGFB2/BCL2/TGFBR2         | 7 | 0.0446931<br>67882417<br>1 |
| GO REGULATION OF OSSIFICATION                | HIF1A/CCR1/RBPJ/TGFB2/BCL2/NPNT                  | 6 | 0.0447418<br>66970874<br>5 |
| GO EXTRACELLULAR MATRIX DISASSEMBLY          | LCP1/CTSS/CD44/ADAM10                            | 4 | 0.0449982<br>36529548<br>7 |
| GO BLOOD VESSEL MORPHOGENESIS                | ETS1/HIF1A/CALCRL/NRP1/KDR/RBPJ/TGFB2/SYK/TGFBR2 | 9 | 0.0449982<br>36529548<br>7 |
| GO CELL CORTEX                               | DLC1/WIPF1/PARD3/WIPF2/EPS8/COBL/FMNL1           | 7 | 0.0457376<br>04208765      |
| GO POSITIVE REGULATION OF GROWTH             | CDKL5/NRP1/RBPJ/TGFB2/BCL2/TGFBR2/ADAM10         | 7 | 0.0457376<br>04208765      |
| GO REGULATION OF LEUKOCYTE APOPTOTIC PROCESS | LYN/HIF1A/BTK/TGFB2                              | 4 | 0.0463326<br>01133550<br>9 |
| GO EXTERNAL SIDE OF PLASMA MEMBRANE          | ADAM9/PTPRC/ICAM1/CCR1/TGFBR2/FCN1/RTN4RL1       | 7 | 0.0463701<br>96564807<br>4 |
| GO CELLULAR RESPONSE TO MECHANICAL STIMULUS  | HIF1A/MAP3K1/NFKB1/MYD88                         | 4 | 0.0472603<br>73994806<br>3 |

|                                                        |                                                       |   |                            |
|--------------------------------------------------------|-------------------------------------------------------|---|----------------------------|
| GO RUFFLE MEMBRANE                                     | CDKL5/LCP1/DLC1/EPS8                                  | 4 | 0.0472603<br>73994806<br>3 |
| GO POSITIVE REGULATION OF SECRETION                    | HIF1A/ADAM9/P2RY1/OXCT1/PFKFB2/HLA-E/TGFB2/SYK/FCN1   | 9 | 0.0472603<br>73994806<br>3 |
| GO REGULATION OF CHEMOTAXIS                            | LYN/NRP1/NCKAP1L/KDR/CCR1/ADAM10                      | 6 | 0.0472603<br>73994806<br>3 |
| GO RESPONSE TO TOXIC SUBSTANCE                         | ETS1/LYN/HIF1A/KDM3B/DNMT3A/CYB5R4/BCL2               | 7 | 0.0472603<br>73994806<br>3 |
| GO GUANYL NUCLEOTIDE EXCHANGE FACTOR ACTIVITY          | ARHGEF3/CSF2RB/DOCK10/MADD/DOCK7/VAV1/DENND5B/ARFGEF1 | 8 | 0.0472603<br>73994806<br>3 |
| GO CELL SUBSTRATE JUNCTION ASSEMBLY                    | RCC2/DLC1/BCL2                                        | 3 | 0.0473458<br>07154604<br>2 |
| GO MYELOID CELL ACTIVATION INVOLVED IN IMMUNE RESPONSE | LYN/PIK3CD/SYK                                        | 3 | 0.0473458<br>07154604<br>2 |
| GO CELL JUNCTION ASSEMBLY                              | RCC2/TJP1/DLC1/PARD3/BCL2                             | 5 | 0.0473458<br>07154604<br>2 |
| GO REGULATION OF PHOSPHATASE ACTIVITY                  | NCKAP1L/CSRNP2/SPRED1/TGFB2/NPNT                      | 5 | 0.0473458<br>07154604<br>2 |
| GO POSITIVE REGULATION OF LYMPHOCYTE                   | BTK/NCKAP1L/SYK/TGFBR2                                | 4 | 0.0473458<br>07154604<br>2 |

|                                                       |                                                                |    |                            |
|-------------------------------------------------------|----------------------------------------------------------------|----|----------------------------|
| DIFFERENTIATION                                       |                                                                |    |                            |
| GO ASYMMETRIC CELL DIVISION                           | PARD3/DOCK7                                                    | 2  | 0.0473458<br>07154604<br>2 |
| GO CARDIOBLAST DIFFERENTIATION                        | RBPJ/TGFB2                                                     | 2  | 0.0473458<br>07154604<br>2 |
| GO CELLULAR RESPONSE TO LIPOPROTEIN PARTICLE STIMULUS | ITGB2/SYK                                                      | 2  | 0.0473458<br>07154604<br>2 |
| GO PATHWAY RESTRICTED SMAD PROTEIN PHOSPHORYLATION    | TGFB2/TGFBR2                                                   | 2  | 0.0473458<br>07154604<br>2 |
| GO ACTIN CYTOSKELETON                                 | ABL2/IQGAP1/LCP1/ZNF185/FERMT3/DLC1/WIPF1/WIPF2/COBL/CTTNBP2NL | 10 | 0.0483942<br>84709250<br>2 |
| GO REGULATION OF HOMOTYPIC CELL CELL ADHESION         | LYN/PTPRC/NCKAP1L/HLA-E/CD44/VAV1/SYK/TGFBR2                   | 8  | 0.0483942<br>84709250<br>2 |
| GO CELL JUNCTION ORGANIZATION                         | RCC2/TJP1/DLC1/PARD3/TGFB2/BCL2                                | 6  | 0.0483942<br>84709250<br>2 |
| GO REGULATION OF RAS PROTEIN SIGNAL TRANSDUCTION      | DLC1/ARHGEF3/MADD/TGFB2/VAV1/ARFGEF1                           | 6  | 0.0483942<br>84709250<br>2 |
| GO PROTEIN SERINE THREONINE KINASE ACTIVITY           | CDKL5/MAP3K1/DSTYK/SLK/CSNK1G1/TGFB2/HIPK3/SYK/TGFBR2/NEK7     | 10 | 0.0485765<br>21316902<br>6 |

|                                                           |                                                   |   |                            |
|-----------------------------------------------------------|---------------------------------------------------|---|----------------------------|
| GO<br>NEGATIVE<br>REGULATI<br>ON OF<br>GTPASE<br>ACTIVITY | RCC2/IQGAP1/ARFGEF1                               | 3 | 0.0487243<br>00781014<br>8 |
| GO KINASE<br>REGULATO<br>R ACTIVITY                       | IQGAP1/NCKAP1L/LRP6/MADD/SPRED1/RTN4RL1           | 6 | 0.0490593<br>64958055<br>4 |
| GO<br>RECEPTOR<br>METABOLI<br>C PROCESS                   | CALCRL/SH3GLB1/ITGB2/SYK                          | 4 | 0.0497552<br>59963609      |
| GO B CELL<br>ACTIVATIO<br>N                               | BTK/PIK3CD/PTPRC/RBPJ/BCL2                        | 5 | 0.0497552<br>59963609      |
| GO<br>MIDBODY                                             | RCC2/IQGAP1/SH3GLB1/KIF3B/C6orf89                 | 5 | 0.0497552<br>59963609      |
| GO<br>EXOCYTOSI<br>S                                      | RAB11FIP1/LYN/PIK3CD/CCR1/SCRN1/TGFB2/SYK/ARFGEF1 | 8 | 0.0497552<br>59963609      |

**Supplementary Table 9. Upregulated Gene Ontology pathways in carriers as compared to non-carriers of the HSD17B13 variant.**

| <b>Description</b>                       | <b>geneID</b>                      | <b>Count</b> | <b>qvalue</b>       |
|------------------------------------------|------------------------------------|--------------|---------------------|
| GO PROTEIN TARGETING TO MITOCHONDRION    | MTX2/TOMM34/DNAJC19/TOMM40L/TIMM10 | 5            | 0.00406638544931212 |
| GO PROTEIN LOCALIZATION TO MITOCHONDRION | MTX2/TOMM34/DNAJC19/TOMM40L/TIMM10 | 5            | 0.00889075167487519 |

**Supplementary Table 10. Gene specific primers used in qPCR analyses.**

| <b>Gene</b> | <b>Primer Sequence (F-forward, R-reverse)</b> |
|-------------|-----------------------------------------------|
| ALOX5-F     | ACAAGCCCTTCTACAACGACT                         |
| ALOX5-R     | AGCTGGATCTCGCCCAGTT                           |
| PLA2G12A-F  | TGCAGTGACGGATCTAAGCCT                         |
| PLA2G12A-R  | GTCAGGGAAGGGATACCAATGT                        |
| HIF1A-F     | GAACGTCGAAAAGAAAAGTCTCG                       |
| HIF1A-R     | CCTTATCAAGATGCGAACTCACA                       |
| TGFB2-F     | CAGCACACTCGATATGGACCA                         |
| TGFB2-R     | CCTCGGGCTCAGGATAGTCT                          |
| TRAF3-F     | CTCACAAGTGCAGCGTCCAG                          |
| TRAF3-R     | GCTCCACTCCTTCAGCAGGT                          |
| ABCB4-F     | CAGTACTGGTGCACCTTCTACAAGACTT                  |
| ABCB4-R     | TGCAATTAAAGCCAACCTGGTT                        |
| LPIN3-F     | GGAGGAAACCCAAGCAGAAAG                         |
| LPIN3-R     | AGGGATAGCTCACTCTCAGCG                         |
| PLCD3-F     | CCAGAACCACTCTCAGCATCCA                        |
| PLCD3-R     | GCCATTGTTGAGCACGTAGTCAG                       |
| PLD4-F      | AACATGGACTGGCGGTCTCTGA                        |
| PLD4-R      | CCAGTAGGTCTGGAAGGTCTTC                        |
| PCYT1A-F    | CTCCACATCAGACATCATCACC                        |
| PCYT1A-R    | TTACTTTGTCAACCCTCTCCTG                        |
| CHPT1-F     | CACCGAAGAGGCACCATACTG                         |
| CHPT1-R     | CCCTAAAGGGGAACAAGAGTTTG                       |
| CEPT1-F     | ATGTGGAGATTCTCACCCGGA                         |
| CEPT1-R     | TCTTCTAGCCGCTTTAGTTGGT                        |
| PEMT-F      | GGGGTTCGCTGGAACCTTC                           |
| PEMT-R      | GAGCCACTATGTAGGTGAGGG                         |
| COL3A1-F    | TGGTCTGCAAGGAATGCCTGGA                        |
| COL3A1-R    | TCTTTCCTGGGACACCATCAG                         |

|                  |                           |
|------------------|---------------------------|
| $\beta$ -ACTIN-F | GACAGGATGCAGAAGGAGAT      |
| $\beta$ -ACTIN-R | TGATCCACATCTGCTGGAAGG     |
| 36B4-F           | CATGCTCAACATCTCCCCTTCTCC  |
| 36B4-R           | GGGAAGGTGTAATCCGTCTCCACAG |

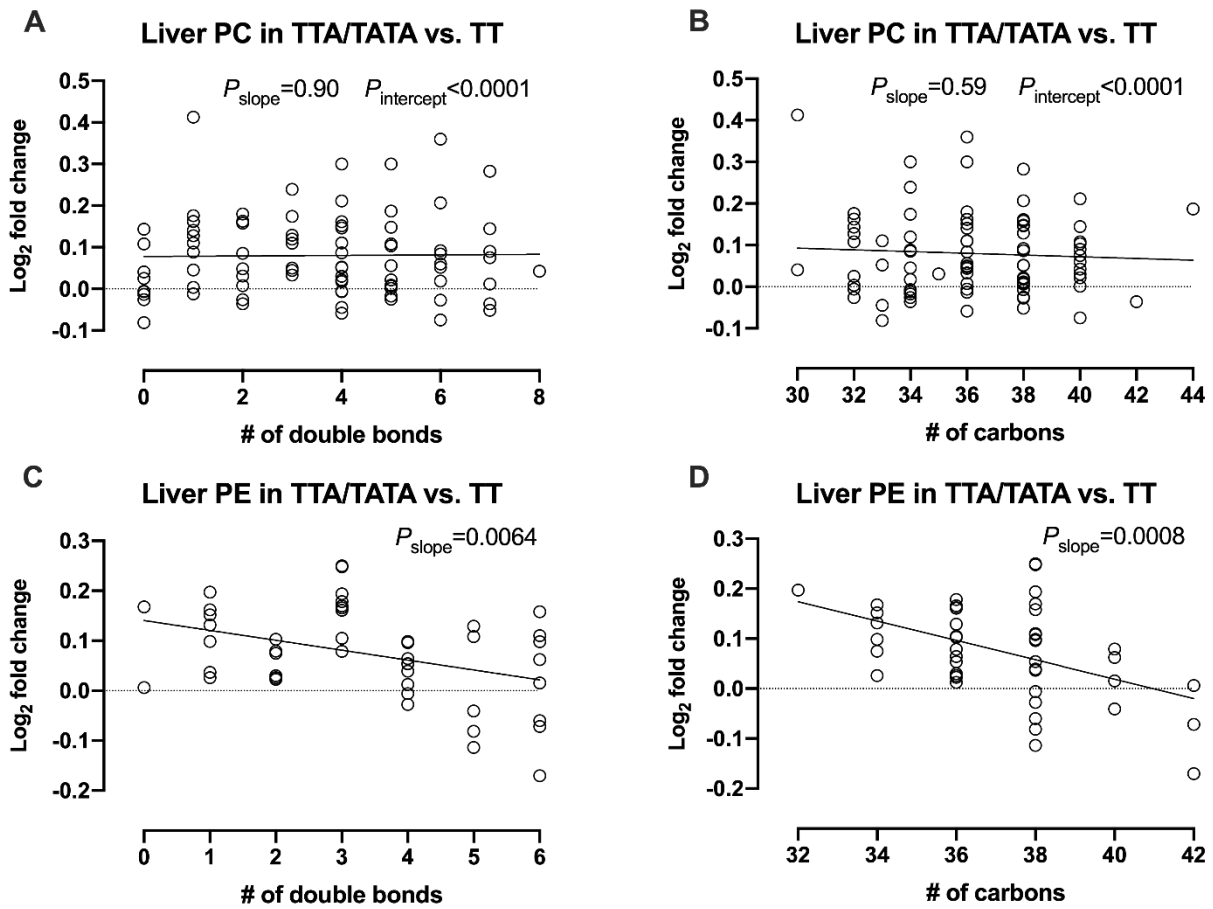

**Supplementary Figure 1. Hepatic phospholipids in carriers of the HSD17B13 gene variant as compared to non-carriers according to number of double bonds and carbons.** Linear regression between the number of double bonds (A, C) or carbons (B, D) in liver phosphatidylcholines (PC) (A-B) and liver phosphatidylethanolamines (PE) (C-D) and fold change of mean concentrations of respective lipids in the TTA/TATA (n=38) vs. TT group (n=48) (*solid line*). Each circle denotes an individual lipid species. The intercepts and slopes denote deviation of this regression line from 0 (*dashed line*).



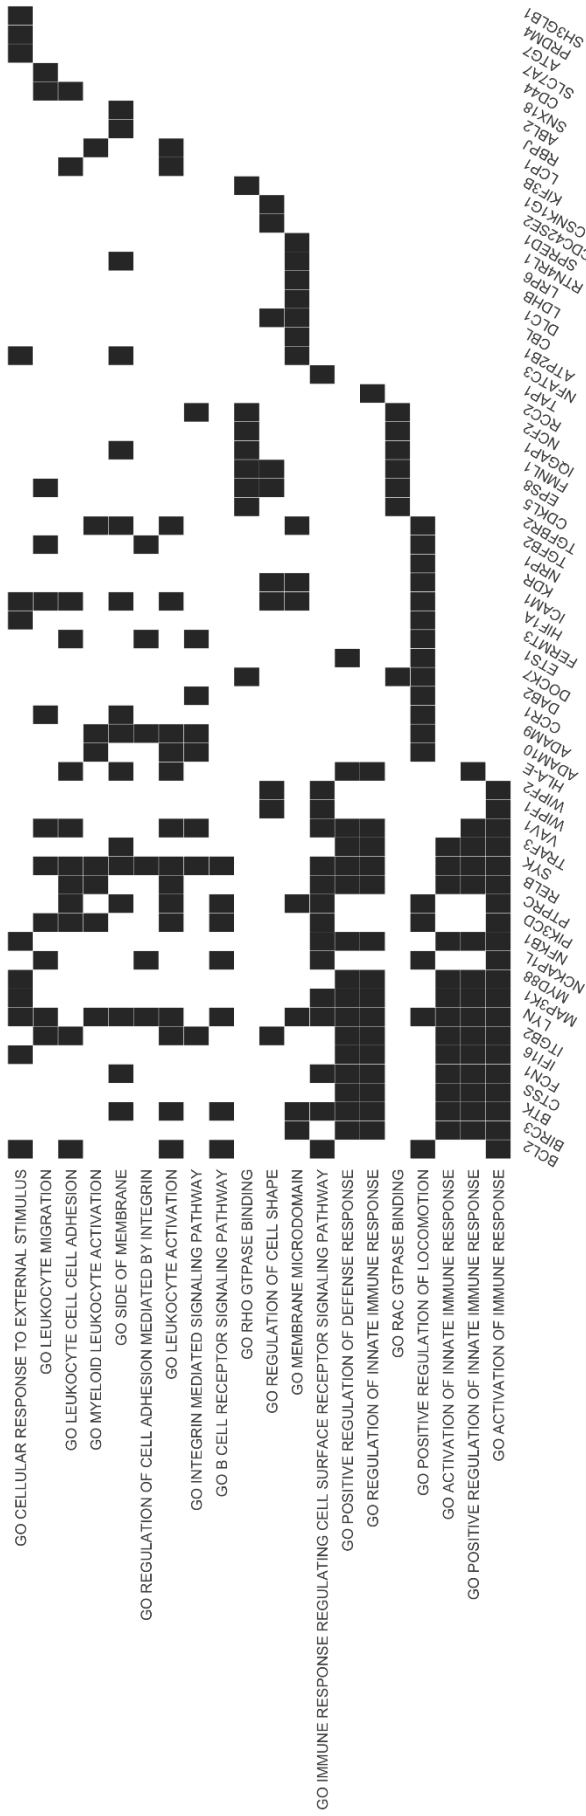

**Supplementary Figure 2. Genes in the downregulated pathways in the livers of carriers of the HSD17B13 gene variant.** Y-axis denotes the downregulated Gene Ontology (GO) pathways and the x-axis the individual genes in these pathways in the liver of carriers of the HSD17B13 variant (n=36) as compared to non-carriers (n=50).
